1 **The MADS-box transcription factor PHERES1 controls imprinting in the endosperm by binding to**  
2 **domesticated transposons**

3

4 Rita A. Batista<sup>1</sup>, Jordi Moreno-Romero<sup>1,2</sup>, Yichun Qiu<sup>1</sup>, Joram van Boven<sup>1</sup>, Juan Santos-González<sup>1</sup>,  
5 Duarte D. Figueiredo<sup>1,3</sup>, Claudia Köhler<sup>1\*</sup>

6

7 1. Department of Plant Biology, Uppsala BioCenter, Swedish University of Agricultural Sciences and  
8 Linnean Centre for Plant Biology, Uppsala, Sweden

9 2. Present address: Centre for Research in Agricultural Genomics (CRAG), CSIC-IRTA-UAB-UB, Campus  
10 UAB, Bellaterra, Barcelona, Spain

11 3. Present address: Institute for Biochemistry and Biology, University of Potsdam, Germany

12 \* Corresponding author (claudia.kohler@slu.se)

13 **Abstract**

14 MADS-box transcription factors are ubiquitous in eukaryotic organisms and play major roles during  
15 plant development. Nevertheless, their function in seed development remains largely unknown. Here  
16 we show that the imprinted *Arabidopsis thaliana* MADS-box TF PHERES1 (PHE1) is a master regulator  
17 of paternally expressed imprinted genes, as well as of non-imprinted key regulators of endosperm  
18 development. PHE1 binding sites show distinct epigenetic modifications on maternal and paternal  
19 alleles, correlating with parental-specific transcriptional activity. Importantly, we show that the CArG-  
20 box-like DNA-binding motifs bound by PHE1 have been distributed by RC/Helitron transposable  
21 elements. Our data provide an example of molecular domestication of these elements, which by  
22 distributing PHE1 binding sites throughout the genome, have facilitated the recruitment of crucial  
23 endosperm regulators into a single transcriptional network.

## 24 Introduction

25 MADS-box transcription factors (TFs) are present in most eukaryotes, and classified into two  
26 groups: type I or SRF (Serum Response Factor)-like, and type II or MEF2 (Myocyte Enhancing Factor2)-  
27 like (Gramzow and Theissen, 2010). In flowering plants, type I MADS-box TFs are associated with  
28 reproductive development and many are active in the endosperm, a nutritive seed tissue that supports  
29 embryo growth (Bemer et al., 2010). Deregulation of type I MADS-box TF genes has been frequently  
30 linked to failure of endosperm development and seed inviability, both in the Brassicaceae (Erilova et  
31 al., 2009; Lu et al., 2012; Rebernic et al., 2015; Tiwari et al., 2010), and in crop species like tomato and  
32 rice (Ishikawa et al., 2011; Roth et al., 2019). In *Arabidopsis thaliana* and other species, the activity of  
33 type I MADS-box TFs has been shown to be associated with the timing of endosperm cellularisation –  
34 an important developmental transition, which is fundamental for seed viability (Erilova et al., 2009;  
35 Kang et al., 2008; Lu et al., 2012; Tiwari et al., 2010). Nevertheless, a mechanistic explanation for these  
36 observations, clarifying the role of MADS-box TFs in endosperm development, remains to be  
37 established.

38 In this work we characterise the function of the type I MADS-box TF PHE1. *PHE1* is active in the  
39 endosperm and is a paternally expressed imprinted gene (Köhler et al., 2005). Imprinting is defined as  
40 an epigenetic phenomenon causing a gene to be preferentially expressed from the maternal or the  
41 paternal allele. In plants, imprinting is mainly manifested in the endosperm, and similarly to type I  
42 MADS-box TFs, imprinted genes have been previously implicated in endosperm development (Erilova  
43 et al., 2009; Figueiredo et al., 2015; Jullien and Berger, 2010; Pignatta et al., 2018; Wolff et al., 2015).  
44 Imprinting relies on the asymmetric distribution of epigenetic marks in maternal and paternal alleles,  
45 which is thought to distinctly impact their transcription (Gehring, 2013; Rodrigues and Zilberman,  
46 2015). However, transcriptional regulators of imprinted genes have not been identified until now.  
47 Thus, the interaction between epigenetic modifications of imprinted genes and their transcriptional  
48 regulation remains unknown. Our results identify PHE1 as a key transcriptional regulator of imprinted  
49 genes, as well as of other genes important for endosperm development. Furthermore, we explore the

50 cross-talk between epigenetic regulation and PHE1 transcriptional activity at imprinted gene loci, and  
51 show that differential parental epigenetic modifications of PHE1 binding sites correlates with the  
52 transcriptional status of the parental alleles. Finally, we reveal that RC/Helitron transposable elements  
53 (TEs) have served as distributors of PHE1 DNA-binding sites, providing an example of molecular  
54 domestication of TEs.

## 55 **Results and Discussion**

56 To identify the genes regulated by PHE1, we performed a ChIP-seq experiment using siliques from  
57 a PHE1::PHE1-GFP line, which has been previously shown to expressed PHE1-GFP exclusively in the  
58 endosperm (Weinhofer et al., 2010). We identified a total of 1942 PHE1 target genes, which were  
59 enriched for Gene Ontology (GO)-terms associated with development, metabolic processes, and  
60 transcriptional regulation, showing that many PHE1 targets are themselves transcriptional regulators  
61 (**Fig. 1 – Fig. Supplement 1a**). Among PHE1 targets are several known regulators of endosperm  
62 development like *AGL62*, *YUC10*, *IKU2*, *MINI3*, and *ZHOUP1*, revealing a central role for PHE1 in  
63 regulating this developmental process (**Fig. 1 – Fig. Supplement 2**). Importantly, type I MADS-box  
64 family genes were over-represented among PHE1 targets (**Fig. 1 – Fig. Supplement 1a**), pointing to a  
65 high degree of cross-regulation among members of this family.

66 Our data revealed that PHE1 uses two distinct DNA-binding motifs: motif A was present in about  
67 53% of PHE1 binding sites, while motif B could be found in 43% of those (**Fig. 1a**). PHE1 motifs closely  
68 resemble type II CARG-boxes, the signature motif of MADS-box TFs (Folter and Angenent, 2006) (**Fig.**  
69 **1a, Fig. 1 – Fig. Supplement 3**), suggesting that DNA-binding properties between type I and type II  
70 members are conserved.

71 Strikingly, PHE1 binding sites significantly overlapped with TEs, preferentially with those of the  
72 RC/Helitron superfamily (29% (723/2494) in PHE1 binding sites, versus 9% (224/2494) in random  
73 binding sites) (**Fig. 1b**), and in particular with some RC/Helitron subfamilies (**Fig. 1 – Fig. Supplement**  
74 **4**). We thus addressed the question whether RC/Helitrons contain sequence properties that promote

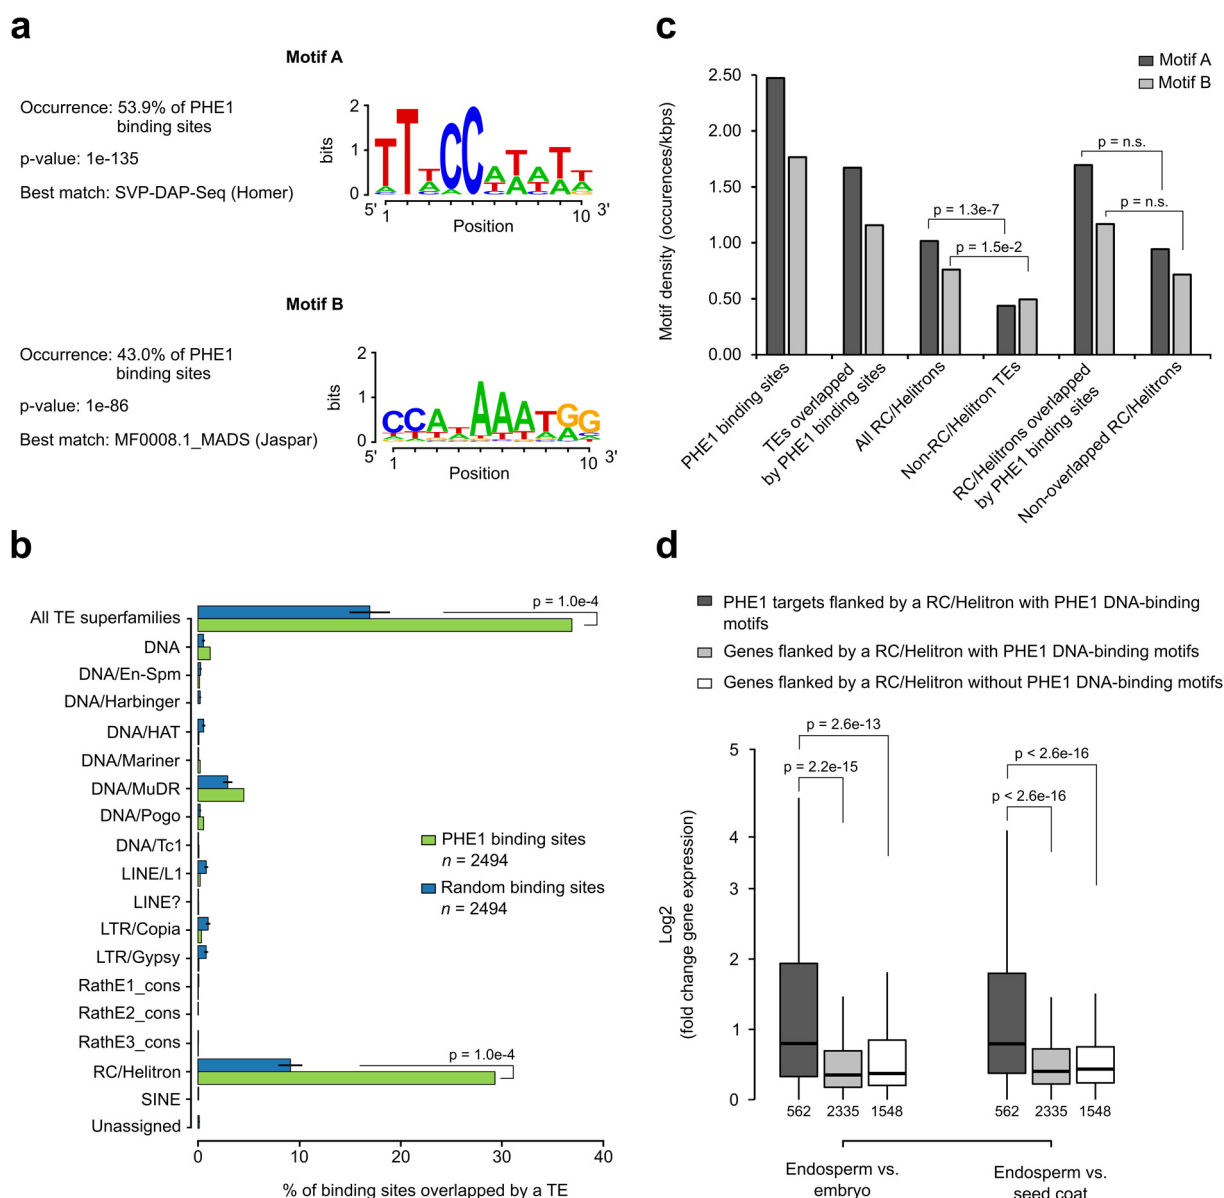

**Figure 1 - RC/Helitrons carry PHE1 DNA-binding motifs.** **a**, CARG-box like DNA-binding motifs identified from PHE1 ChIP-seq data. **b**, Fraction of PHE1 binding sites (green) overlapping transposable elements (TEs.) Overlap is expressed as the percentage of total binding sites where spatial intersection with features on the y-axis is observed. A set of random binding sites is used as control (blue). This control set was obtained by randomly shuffling the PHE1 binding sites in *A. thaliana* gene promoters (see Methods). P-values were determined using Monte Carlo permutation tests (see Methods). Bars represent  $\pm$  sd, ( $n = 2494$ , PHE1 binding sites, Random binding sites). **c**, Density of PHE1 DNA-binding motifs in different genomic regions of interest. P-values were determined using  $\chi^2$  tests. **d**, Fold change gene expression of genes flanked by RC/Helitron TEs. Fold change was determined between endosperm and embryo, or between endosperm and seed coat. Genes were divided in three categories depending on their PHE1 target status, and the presence of RC/Helitrons with and without PHE1 DNA-binding motifs. Gene expression data was retrieved from Belmonte et al., (2013). Pre-globular seed stage was used in this analysis. P-values were determined using two-tailed Mann-Whitney tests ( $n =$  number represented below boxplots).

76 PHE1 binding. Indeed, a screen of genomic regions for the presence of PHE1 DNA-binding motifs,  
77 revealed significantly higher motif densities within all RC/Helitrons, compared to other TE  
78 superfamilies (**Fig. 1c**). We found that most RC/Helitron sequences associated with both PHE1 DNA-  
79 binding motifs share sequence homology, and the majority of them could be grouped into one large  
80 cluster, based on sequence identity (**Fig. 1 – Figure Supplement 5**). While the presence of additional  
81 smaller clusters points to a few instances of independent gains of PHE1 DNA-binding motifs through  
82 *de novo* mutation or sequence capture, the grouping of most sequences within one cluster suggests  
83 that a single ancestral RC/Helitron likely acquired a perfect or nearly perfect motif sequence.  
84 Moreover, we could detect the presence of perfect or nearly perfect PHE1 DNA-binding motifs within  
85 the consensus sequences of several RC/Helitron families (**Fig. 1 – Figure Supplement 6**), suggesting  
86 that radiation of RC/Helitrons occurred after the acquisition of the binding motif. Together, these data  
87 suggest that an ancestral RC/Helitron likely played a role in acquiring PHE1 DNA-binding motifs, which  
88 were subsequently amplified in the genome through transposition.

89 Interestingly, even though motif densities were higher in RC/Helitrons overlapped by PHE1 binding  
90 sites than in non-overlapped RC/Helitrons, this difference was not significant (**Fig. 1c**). As the  
91 enrichment of PHE1 DNA-binding motifs is a specific feature of RC/Helitrons, the domestication of  
92 these TEs as *cis*-regulatory regions might facilitate TF binding and modulation of gene expression. In  
93 line with this, we detected that genes flanked by RC/Helitrons carrying bound PHE1 DNA-binding  
94 motifs were more highly expressed in the endosperm than in other seed tissues (**Fig. 1d**). This shows  
95 that for a subset of genes, these TEs can be effectively used as sites for PHE1 binding, thus triggering  
96 endosperm-specific expression.

97 Among the PHE1 target genes we detected a significant enrichment of imprinted genes, with 12%  
98 of all maternally expressed genes (MEGs) and 31% of all paternally expressed genes (PEGs) being  
99 targeted (**Fig. 2a**). Imprinted gene expression relies on parental-specific epigenetic modifications,  
100 which are asymmetrically established during male and female gametogenesis, and inherited in the  
101 endosperm (Gehring, 2013; Rodrigues and Zilberman, 2015). Demethylation of repeat sequences and

**Figure 2 - Parental asymmetry of epigenetic marks in imprinted gene promoters conditions PHE1 binding.** **a**, Fraction of non-imprinted and published imprinted genes targeted by PHE1. P-values were determined using the hypergeometric test. The list of published imprinted genes used for this analysis is detailed in Fig 1. - source data 1. **b**, Heatmap of endosperm H3K27me3 distribution along PHE1 binding sites. Each horizontal line represents one binding site. Clusters were defined based on the pattern of H3K27me3 distribution (see Methods) **c**, Metagene plot of average maternal (♀, pink), paternal (♂, blue) and total (grey) endosperm H3K27me3 along PHE1 binding sites. **d**, CG methylation levels in maternal (♀, upper panel) and paternal (♂, lower panel) alleles of PHE1 binding sites associated with MEGs (yellow), PEGs (green) and non-imprinted (grey) PHE1 targets. P-values were determined using two-tailed Mann-Whitney tests. **e**, Sanger sequencing of imprinted and non-imprinted gene promoters bound by PHE1. SNPs for maternal (*Ler*) and paternal (*Col*) alleles are shown, ( $n = 1$  biological replicate). Maternal:total read ratios for imprinted genes are as follows: AT1G55650 – 1.0; AT2G28890 – 0.97; AT3G18550 – 0.44; AT2G20160 – 0.32.

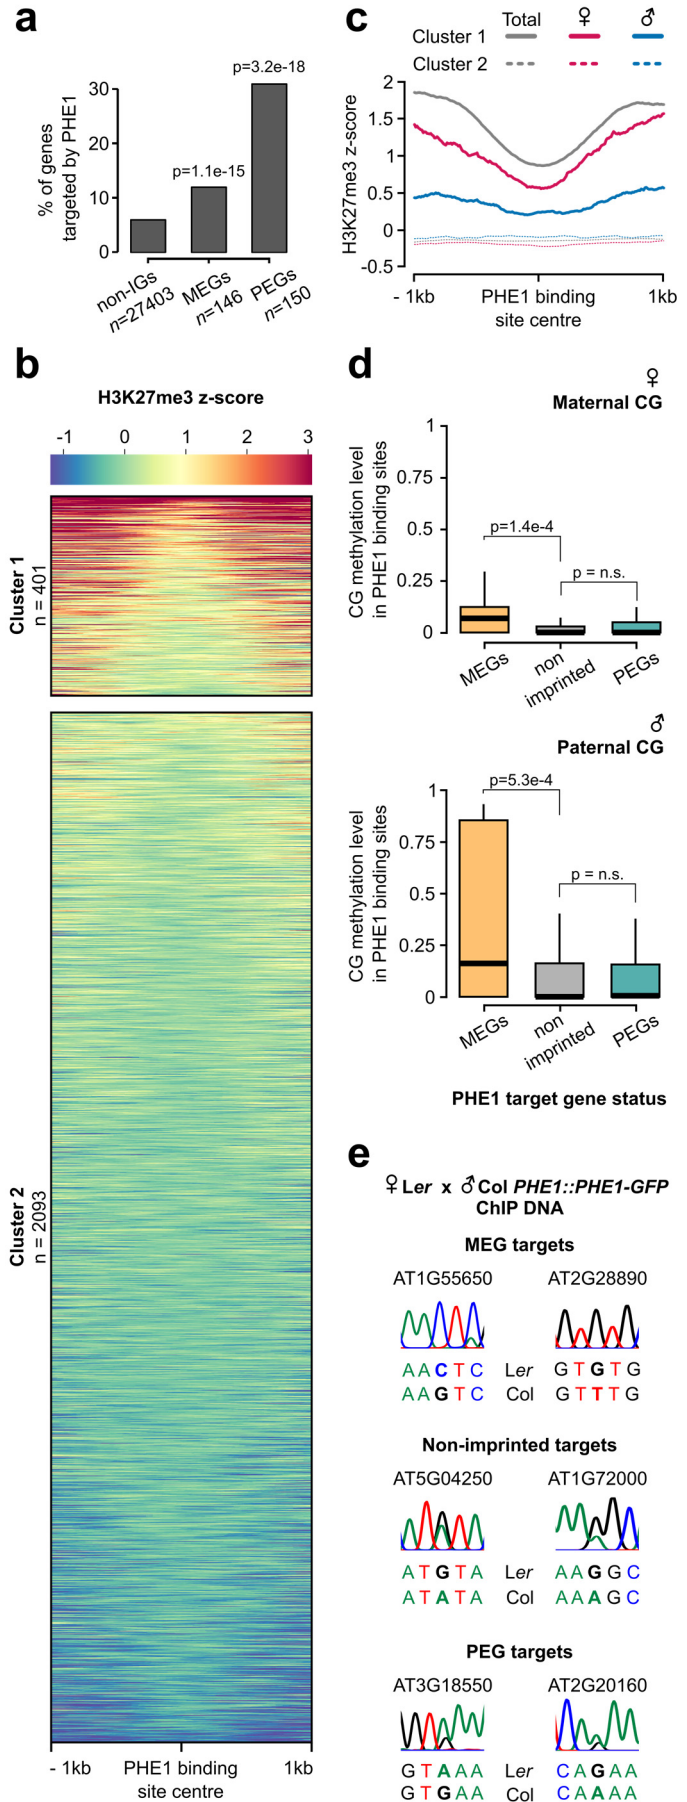

103 TEs – occurring in the central cell, but not in sperm – is a major driver for imprinted gene expression  
104 (Gehring, 2013; Rodrigues and Zilberman, 2015). In MEGs, DNA hypomethylation of maternal alleles  
105 leads to their expression, while DNA methylation represses the paternal allele (Gehring, 2013;  
106 Rodrigues and Zilberman, 2015). In PEGs, the hypomethylated maternal allele undergoes  
107 trimethylation of lysine 27 of histone H3 (H3K27me3), a repressive histone modification established  
108 by the Fertilization Independent Seed-Polycomb Repressive Complex2 (FIS-PRC2). This renders the  
109 maternal alleles inactive, while the paternal allele is expressed (Gehring, 2013; Moreno-Romero et al.,  
110 2016; Rodrigues and Zilberman, 2015).

111 Given the significant overrepresentation of imprinted genes among PHE1 targets, we assessed how  
112 the epigenetic landscape at those loci correlates with DNA-binding by PHE1. We surveyed levels of  
113 endosperm H3K27me3 within PHE1 binding sites and identified two distinct clusters (**Fig. 2b**). Cluster  
114 1 was characterized by an accumulation of H3K27me3 in regions flanking the centre of the binding site,  
115 while the centre itself was devoid of this mark. Cluster 2 contained binding sites largely devoid of  
116 H3K27me3. The distribution of H3K27me3 in cluster 1 was mostly attributed to the deposition of  
117 H3K27me3 on the maternal alleles, while the paternal alleles were devoid of this mark (**Fig. 2c**) – a  
118 pattern usually associated with PEGs (Moreno-Romero et al., 2016). Consistently, genes associated  
119 with cluster 1 binding sites had a more paternally-biased expression in the endosperm when compared  
120 to genes associated with cluster 2 (**Fig. 2 – Fig. Supplement 1a**). This is reflected by more PEGs and  
121 putative PEGs being associated with cluster 1 (**Fig. 2 – Fig. Supplement 1b**). We also identified parental-  
122 specific differences in DNA methylation, specifically in the CG context: PHE1 binding sites associated  
123 with MEGs had significantly higher methylation levels in paternal alleles than in maternal alleles (**Fig.**  
124 **2d**).

125 We hypothesized that the differential parental deposition of epigenetic marks in parental alleles of  
126 PHE1 binding sites can result in differential accessibility of each allele. This might impact the binding  
127 of PHE1, and therefore also impact transcription in a parent-of-origin-specific manner. To test this, we  
128 performed ChIP using a *Ler* maternal plant and a *Col PHE1::PHE1-GFP* pollen donor, taking advantage



129 of SNPs between these two accessions to discern parental preferences of PHE1 binding. Using Sanger  
130 sequencing, we determined the parental origin of enriched CHIP-DNA in MEG, non-imprinted, and PEG  
131 targets (**Fig. 2e, Fig. 2 – Fig. Supplement 2**). While binding of PHE1 was biallelic in non-imprinted  
132 targets (**Fig 2e**), only maternal binding was detected in the tested MEG targets, supporting the idea  
133 that CG hypermethylation of paternal alleles prevents their binding by PHE1 (**Fig. 2e, Fig. 2 – Fig.**  
134 **Supplement 3a**). Interestingly, we observed biallelic binding in PEG targets (**Fig. 2e**). Even though the  
135 maternal PHE1 binding sites in PEGs were flanked by H3K27me3 (**Fig. 2b-c**), correlating with  
136 transcriptional repression of maternal alleles, the absence of this mark within the binding site centres  
137 seems to be permissive for maternal PHE1 binding. We speculate that the accessibility of this site might  
138 be important to mediate recruitment of H3K27me3 in the central cell and/or for maintenance of this  
139 mark during endosperm development (**Fig. 2 – Fig. Supplement 3a**).

140 Previous studies have shown that PEGs are often flanked by RC/Helitrons (Pignatta et al., 2014;  
141 Wolff et al., 2011), a phenomenon suggested to lead to the parental asymmetry of epigenetic marks

**Figure 3 - Ancestral RC/Helitron insertions are associated with gain of imprinting in the Brassicaceae.** a-e, Phylogenetic analyses of PHE1-targeted PEGs and their homologs. Each panel represents a distinct target gene, and its corresponding homologs in different species. The genes in grey background have homologous RC/Helitron sequences in their promoter region. The arrow indicates the putative insertion of an ancestral RC/Helitron. The identity of the RC/Helitron identified in *A. thaliana* is indicated. These *A. thaliana* RC/Helitrons contain a PHE1-DNA binding motif and are associated with a PHE1 binding site. The inset boxes represent the alignment between the *A. thaliana* PHE1 DNA-binding motif and similar DNA motifs contained in RC/Helitrons present at the promoter regions of orthologous genes. When available, the imprinting status of a given gene is indicated by the presence of ♂ (PEG), or ♀ (non-imprinted), and reflects the original imprinting analyses done in the source publications (see Methods). The maternal:total read ratio (M/T) for each gene is also indicated. §: potential contamination from maternal tissue. \*: accession-biased expression. Scale bar represents substitution per site for the ML tree. The tree is unrooted. Gene identifier nomenclatures: AT, *Arabidopsis thaliana*; AL, *Arabidopsis lyrata*; Araha, *Arabidopsis halleri*; Bostr, *Boechera stricta*; Carubv, *Capsella rubella*; Cagra, *Capsella grandiflora*; Tp, *Schrenkiella parvula*; SI, *Sisymbrium irio*; Bol, *Brassica oleracea*; Brapa, *Brassica rapa*; Thhalv, *Eutrema salsugineum*; AA, *Aethionema arabicum*; THA, *Tarenaya hassleriana*; Cpa, *Carica papaya*; TCA, *Theobroma cacao*; Gorai, *Gossypium raimondii*; RCO, *Ricinus communis*; FVE, *Fragaria vesca*; GSVIVG, *Vitis vinifera*.



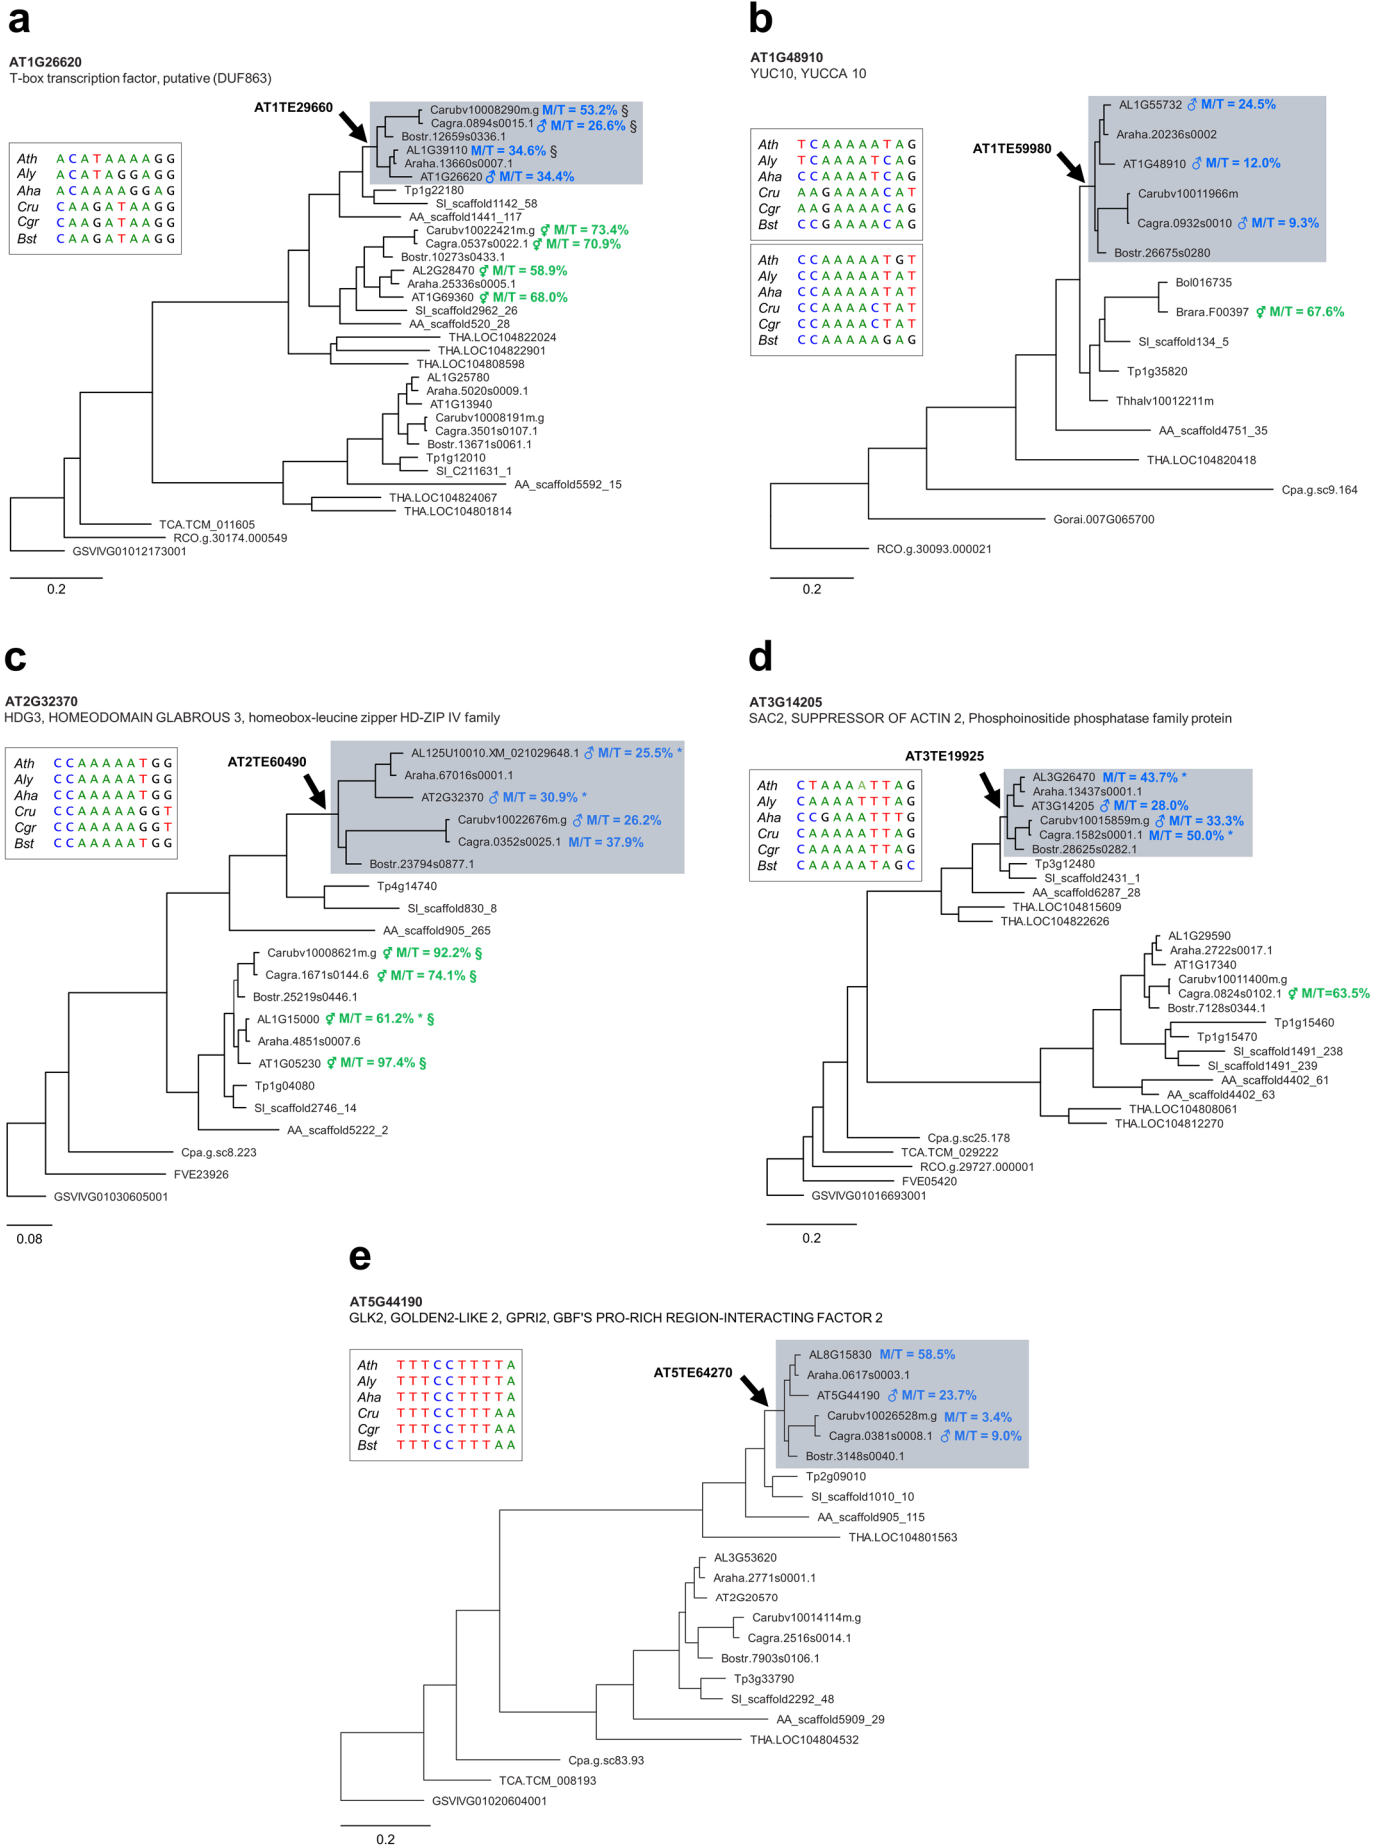

143 in these genes (Moreno-Romero et al., 2016; Pignatta et al., 2014). Consistent with our finding that  
144 PHE1 binding sites overlapped with RC/Helitrons (**Fig. 1b**), we found that PHE1 DNA-binding motifs  
145 were contained within these TEs significantly more frequently in PEGs than in non-imprinted genes  
146 (**Fig. 2 – Fig. Supplement 3b**). Furthermore, we detected the presence of homologous RC/Helitrons  
147 containing PHE1 binding motifs in the promoter regions of several PHE1-targeted PEG orthologs (**Fig.**  
148 **3 a-e, Fig. 3 – Figure Supplement 1**), indicating ancestral insertion events. The presence of these  
149 RC/Helitrons correlated with paternally-biased expression of the associated orthologs, providing  
150 further support to the hypothesis these TEs contribute to the gain of imprinting, especially of PEGs.  
151 Thus, besides facilitating the asymmetry of epigenetic marks, these TEs can contribute to the  
152 generation of novel gene promoters that ensure the timely endosperm expression of PEGs, under the  
153 control of PHE1, and possibly other type I MADS-box TFs (**Fig. 2 – Fig. Supplement 3a**).

154 Among the PEGs targeted by PHE1 were *ADM*, *SUVH7*, *PEG2*, and *NRPD1a* (**Fig. 1 – Fig. Supplement**  
155 **2**). Mutants in all four PEGs suppress the abortion of triploid (3x) seeds generated by paternal excess  
156 interploidy crosses (Martinez et al., 2018; Satyaki and Gehring, 2019; Wolff et al., 2015). Furthermore,  
157 we found that close to 50% of highly upregulated genes in 3x seeds are targeted by PHE1 (**Fig. 4a**),  
158 suggesting this TF might play a central role in mediating the strong gene deregulation observed in these  
159 seeds. If this is true, removal of PHE1 in 3x seeds is expected to suppress 3x seed inviability. To test  
160 this hypothesis, we generated a *phe1* CRISPR/Cas9 mutant in the *phe2* background, since both genes  
161 are likely redundant (Villar et al., 2009) (**Fig. 4 – Fig. Supplement 1a**). We introduced *phe1 phe2* into  
162 the *omission of second division 1 (osd1)* mutant background, which produces diploid gametes at high  
163 frequency (d'Erfurth et al., 2009). Wild-type (wt) and *phe2* maternal plants pollinated with *osd1* pollen  
164 form 3x seeds that abort at high frequency (Kradolfer et al., 2013) (**Fig. 4b, Fig. 4 – Fig. Supplement**  
165 **1b**). In contrast, *phe1 phe2 osd1* pollen strongly suppressed 3x seed inviability, reflected by the  
166 increased germination of 3x *phe1 phe2* seeds (**Fig. 4c, Fig. 4 – Fig. Supplement 1c**). This phenotype  
167 could be reverted by introducing the *PHE1::PHE1-GFP* transgene paternally (**Fig. 4b-c, Fig. 4 – Fig.**  
168 **Supplement 1b-c**). Notably, 3x seed rescue was mostly mediated by *phe1*, as the presence of a wt *PHE2*

**Figure 4 - PHE1 establishes 3x seed inviability of**

**paternal excess crosses. a**, Target status of upregulated genes in paternal excess crosses. Highly upregulated genes in 3x seeds are more often targeted by PHE1 ( $p < 2.2 \times 10^{-16}$ ,  $\chi^2$  test). **b-c**, Seed inviability phenotype (b) of paternal excess crosses in wild-type (wt), *phe1 phe2*, and *phe1* complementation lines, with respective seed germination rates (c). The maternal parent is always indicated first. Remaining control crosses are shown in Fig. 4 – Fig. Supplement 1b-c. *n* = numbers on top of bars (seeds). **d**, Parental expression ratio of imprinted genes in the endosperm of 2x (white) and 3x seeds (grey). Solid lines indicate the ratio thresholds for definition of MEGs and PEGs, in 2x and 3x seeds. **e**, Accumulation of H3K27me3 across maternal (♀) and paternal (♂) gene bodies of PEGs in the endosperm of 2x and 3x seeds (white and grey, respectively). H3K27me3 accumulation in MEGs and non-imprinted genes is shown in Fig. 4 – Fig. Supplement 2. P-value was determined using a two-tailed Mann-Whitney test

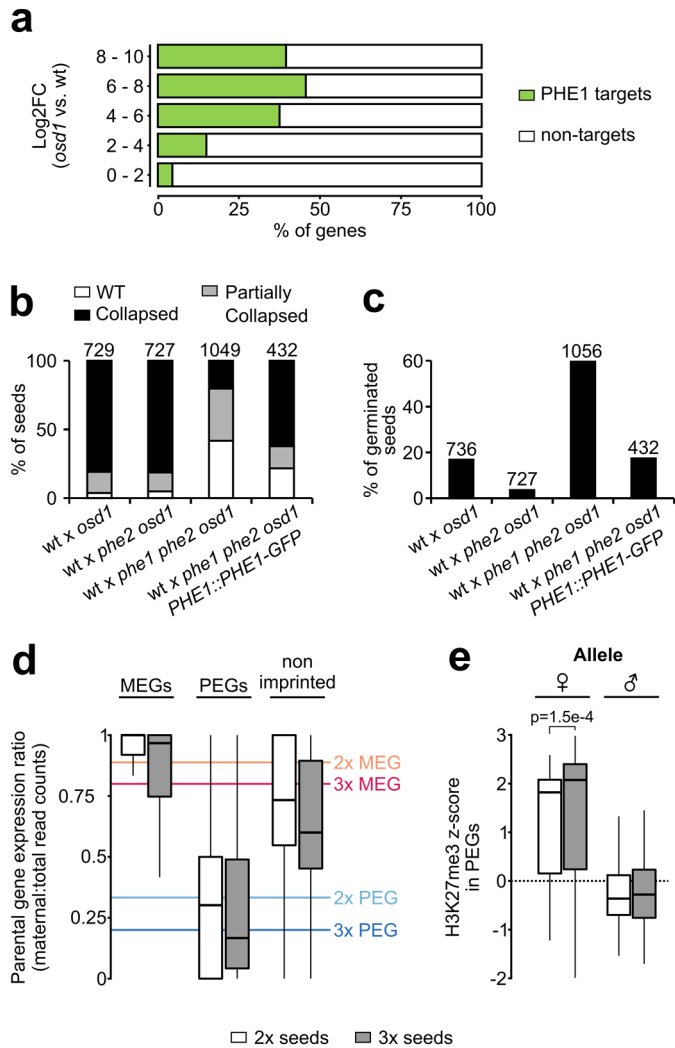

169 allele in 3x seeds (wt x *phe1 phe2 osd1*) led to comparable rescue levels than when having no wt *PHE2*  
 170 allele present (*phe2* x *phe1 phe2 osd1*) (Fig. 4b-c, Fig. 4 – Fig. Supplement 1b-c). Importantly, 3x seed  
 171 rescue was accompanied by reestablishment of endosperm cellularisation (Fig. 4 – Fig. Supplement  
 172 1d-e), and reduced expression of PHE1 target genes (Fig. 4 – Fig. Supplement 1f).

173 Loss of FIS-PRC2 function causes a similar phenotype to that of paternal excess 3x seeds, correlating  
 174 with largely overlapping sets of deregulated genes (Eriova et al., 2009; Tiwari et al., 2010). Since FIS-  
 175 RC2 is a major regulator of PEGs in *Arabidopsis* endosperm (Moreno-Romero et al., 2016), we  
 176 addressed the question whether imprinting is disrupted in 3x seeds. To assess this, we analysed the

177 parental expression ratio of imprinted genes in the endosperm of 2x and 3x seeds. Surprisingly,  
178 imprinting was not disrupted in 3x seeds (**Fig. 4d**), consistent with the presence of similar  
179 H3K27me3 levels on the maternal alleles of PEGs in the endosperm of 2x and 3x seeds (**Fig. 4e, Fig. 4 –**  
180 **Fig. Supplement 2**). Collectively, these data show that the major upregulation of imprinted gene  
181 expression in 3x seeds is due to increased transcription of the active allele, likely mediated by PHE1  
182 and other MADS-box TFs, with maintenance of the imprinting status.

183 In summary, this work reveals that the MADS-box TF PHE1 is a major regulator of imprinted genes  
184 in the *Arabidopsis* endosperm, and that this TF establishes a reproductive barrier in response to  
185 interploidy hybridizations. We furthermore show that deregulated PEGs in 3x seeds remain imprinted,  
186 but that the active allele becomes strongly overexpressed, correlating with increased PHE1 activity in  
187 these seeds (Erilova et al., 2009). Importantly, we reveal a novel role for RC/Helitrons in the regulation  
188 of imprinted genes by showing that they contain PHE1 DNA-binding sites. Our data favour a scenario  
189 where these elements have been domesticated to function as providers of *cis*-regulatory sequences  
190 that facilitate transcription. Similarly, binding sites for type II MADS-box TFs, as well as for E2F TFs,  
191 have been shown to be carried by TEs (Hénaff et al., 2014; Muiño et al., 2016). These results, together  
192 with our study, provide examples of TE-mediated distribution of TF binding sites throughout flowering  
193 plant genomes, adding support to the long-standing idea that transposition facilitates the formation  
194 of *cis*-regulatory architectures required to control complex biological processes (Britten and Davidson,  
195 1971; Feschotte, 2008; Hirsch and Springer, 2017). We speculate that this process may have  
196 contributed to endosperm evolution by allowing the recruitment of crucial developmental genes into  
197 a single transcriptional network, regulated by type I MADS-box TFs. The diversification of the  
198 mammalian placenta has been connected with the dispersal of hundreds of placenta-specific  
199 enhancers by endogenous retroviruses (Chuong et al., 2013; Dunn-Fletcher et al., 2018), suggesting  
200 that the convergent evolution of the endosperm in flowering plants and the mammalian placenta have  
201 been promoted by TE transpositions.

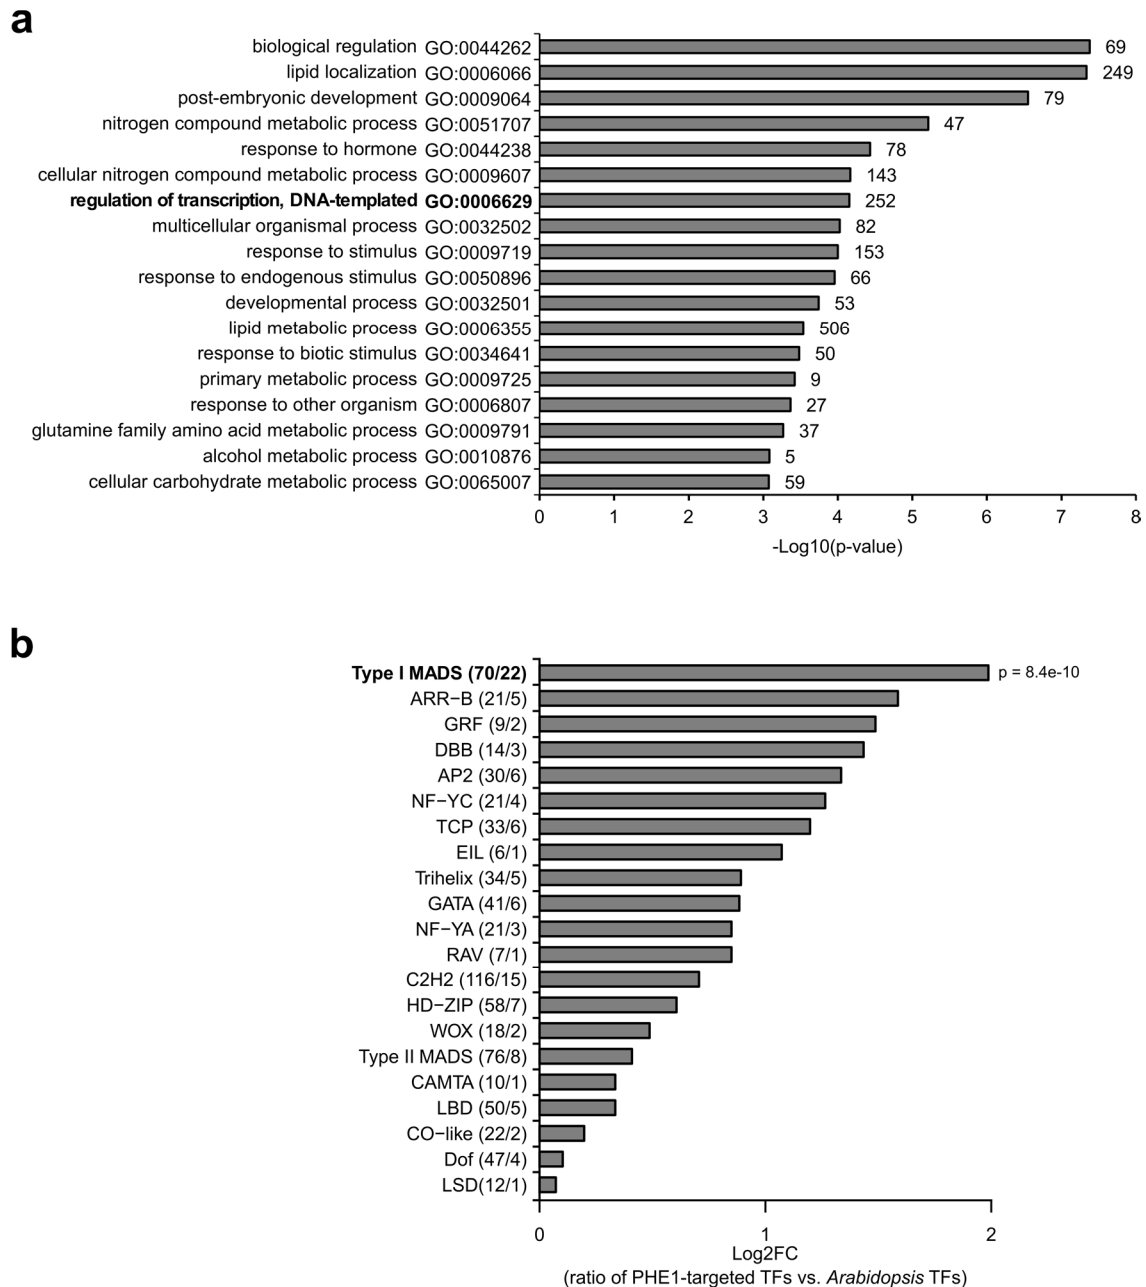

202 **Figure 1 – Figure Supplement 1. Transcription factor genes are enriched among PHE1 targets.**

203 **a**, Enriched biological processes within PHE1 target genes. Numbers on bars indicate number of PHE1  
 204 target genes within each GO-term. **b**, Enrichment of transcription factor (TF) families among PHE1  
 205 target genes (see Methods). Numbers in parenthesis indicate the total number of *Arabidopsis* genes  
 206 belonging to a certain transcription factor family, and the total number of genes in that family targeted  
 207 by PHE1, respectively. P-value was determined using the hypergeometric test.

208 **Figure 1 – Figure Supplement 2. PHE1 target genes previously implicated in endosperm**  
 209 **development.**

| Gene ID       | Imprinting status | Description of function                                                                                                                                                                                                                                                                                                        |
|---------------|-------------------|--------------------------------------------------------------------------------------------------------------------------------------------------------------------------------------------------------------------------------------------------------------------------------------------------------------------------------|
| <i>AGL62</i>  | Non imprinted     | Type I MADS-box TF involved in endosperm proliferation and seed coat development (Figueiredo et al., 2016, 2015; Kang et al., 2008; Roszak and Köhler, 2011)                                                                                                                                                                   |
| <i>YUC10</i>  | PEG               | Flavin monooxygenase that catalyses the last step of the Trp-dependent auxin biosynthetic pathway (Zhao, 2012). Involved in endosperm proliferation and cellularisation (Batista et al., 2019; Figueiredo et al., 2015)                                                                                                        |
| <i>IKU2</i>   | Non imprinted     | Encodes a leucine-rich repeat receptor kinase protein that, together with <i>MINI3</i> , is part of the IKU pathway controlling seed size. <i>iku2</i> mutants show reduced endosperm growth and early endosperm cellularisation (Garcia et al., 2003; Luo et al., 2005).                                                      |
| <i>MINI3</i>  | Non imprinted     | WRKY TF that, together with <i>IKU2</i> , is part of the IKU pathway controlling seed size. <i>mini3</i> mutants show reduced endosperm growth and early endosperm cellularisation (Luo et al., 2005).                                                                                                                         |
| <i>ZHOUP1</i> | Non imprinted     | Encodes a bHLH TF expressed in the embryo surrounding region of the endosperm. It is essential for embryo cuticle formation and endosperm breakdown after its cellularisation (Xing et al., 2013; Yang et al., 2008).                                                                                                          |
| <i>MEA</i>    | MEG               | Subunit of the FIS-PRC2 complex, responsible for depositing H3K27me3 at target loci, including PEGs (Moreno-Romero et al., 2019; Moreno-Romero et al., 2016). Loss of <i>MEA</i> and, consequently, paternally biased expression of PEGs, leads to a 3x seed like phenotype (Grossniklaus et al., 1998; Kiyosue et al., 1999). |
| <i>ADM</i>    | PEG               | Interacts with <i>SUVH9</i> and <i>AHL10</i> to promote H3K9me2 deposition in TEs, influencing neighbouring gene expression. Mutations in <i>ADM</i> lead to rescue of the 3x seed abortion phenotype (Jiang et al., 2017; Kradolfer et al., 2013; Wolff et al., 2015).                                                        |
| <i>SUVH7</i>  | PEG               | Encodes a putative histone-lysine N-methyltransferase. Mutations in <i>SUVH7</i> lead to rescue of the 3x seed abortion phenotype (Wolff et al., 2015).                                                                                                                                                                        |
| <i>PEG2</i>   | PEG               | Encodes a putative SNARE-like superfamily protein, which is not translated in endosperm. <i>PEG2</i> transcripts act as a sponge for siRNA854, thus regulating <i>UBP1</i> abundance (Wang et al., 2018). Mutations in <i>PEG2</i> lead to rescue of the 3x seed abortion phenotype (Wang et al., 2018; Wolff et al., 2015).   |
| <i>NRPD1a</i> | PEG               | Encodes the largest subunit of RNA POLYMERASE IV, involved in the RNA-directed DNA methylation pathway. Mutations in <i>NRPD1a</i> lead to rescue of the 3x seed abortion phenotype (Martinez et al., 2018).                                                                                                                   |

210

**Motif A**

Match: SVP(MADS)/col-SVP-DAP-Seq(GSE60143)/Homer  
Match rank: 1  
Score: 0.83  
Offset: -2

Motif A --TTWCCATATW---  
SVP(MADS) ANTTWCCHAAATTTGG

Motif A --TTTCCATATT---  
SVP(MADS) AATTTCCTAATTGG

**Motif B**

Match: SEP3/MA0563.1/Jaspar  
Match rank: 2  
Score: 0.91  
Offset: 0

Motif B CCAWAAATGG-  
SEP3/MA0563.1/Jaspar CCAAAAATGGA

Motif B CCATAAATGGT  
SEP3/MA0563.1/Jaspar CCAAAAATGGA

211 **Figure 1 – Figure Supplement 3. PHE1 DNA-binding motifs show similarity to type II MADS-box CArG-**

212 **boxes.**

213 Alignment between PHE1 DNA-binding motifs and known motif matches.



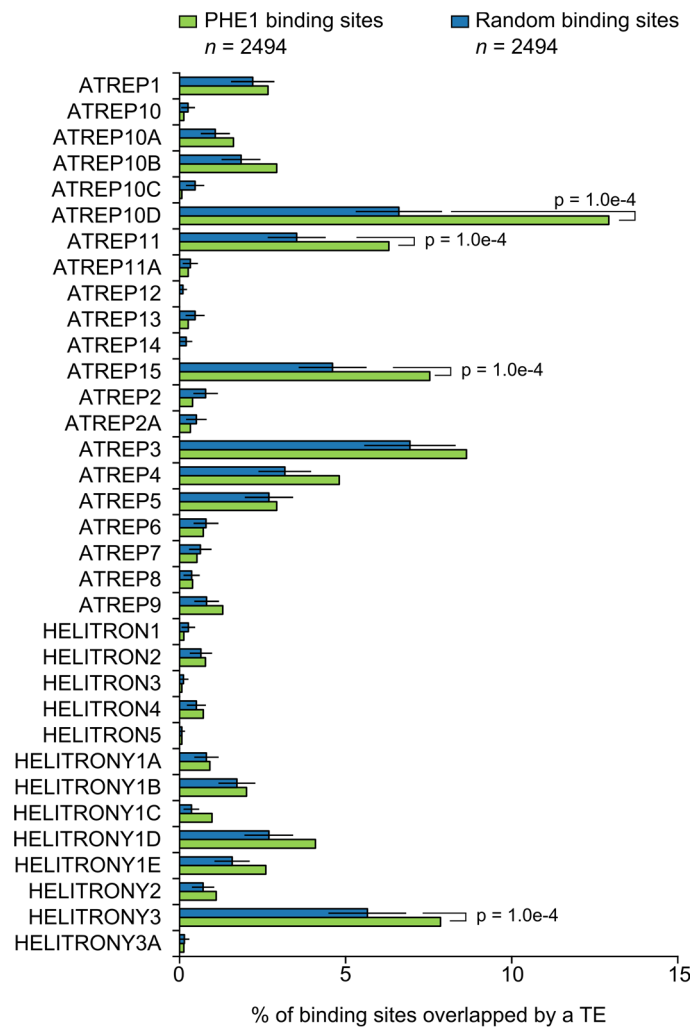

214 **Figure 1 – Figure Supplement 4. RC/Helitron family overlap with PHE1 binding sites.**

215 Fraction of PHE1 binding sites (green) overlapping with different RC/Helitron TE families. Overlap is  
 216 expressed as the percentage of binding sites where spatial intersection with the families specified on  
 217 the y-axis is observed. A set of random binding sites is used as control (blue). This control set was  
 218 obtained by randomly shuffling the PHE1 binding sites in *A. thaliana* gene promoters (see Methods).  
 219 P-values were determined using Monte Carlo permutation tests (see Methods). Bars represent  $\pm$  sd, ( $n$   
 220 = 2494, PHE1 binding sites, Random binding sites).

221

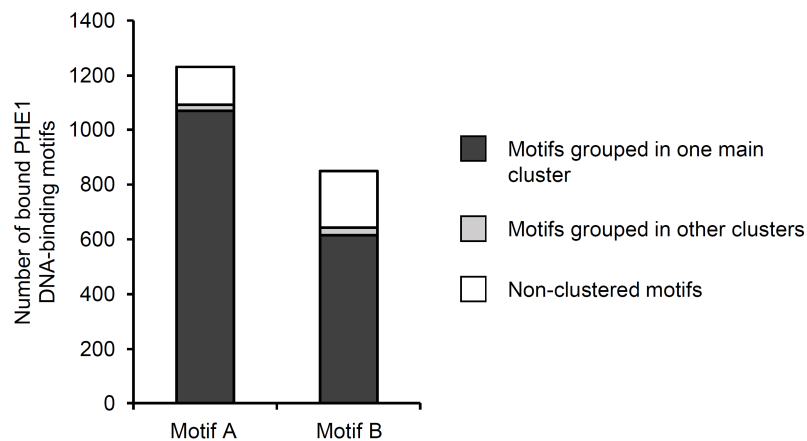

222 **Figure 1 – Figure Supplement 5. Clustering of bound PHE1 DNA-binding motifs.**

223 PHE1-DNA binding motifs and their flanking sequences were paired based on sequence homology. The  
224 pairwise homologous sequences were then merged into higher order clusters, based on shared  
225 elements in the homologous pairs (see Methods). Motifs are those identified in **Fig. 1a**.

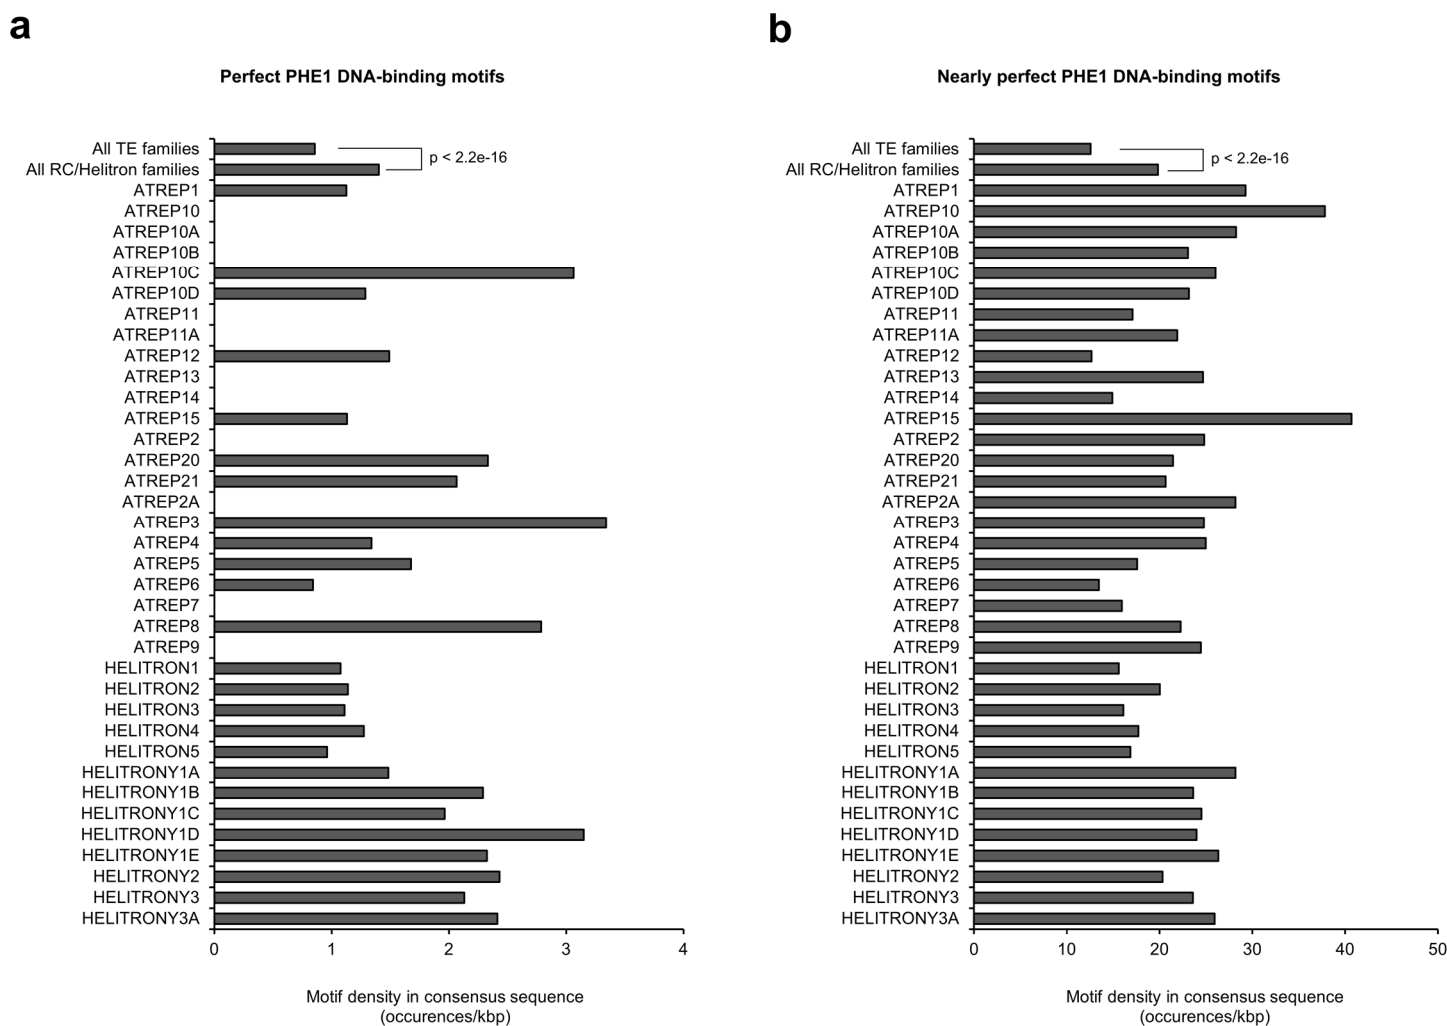

226 **Figure 1 – Figure Supplement 6. PHE1 DNA-binding motif densities in RC/Helitron consensus**  
 227 **sequences.**

228 **a**, Density of perfect PHE1-DNA binding motifs in consensus sequences of different RC/Helitron  
 229 families. Perfect motifs are those described in **Fig. 1a**. As a reference, the density of perfect PHE1 DNA-  
 230 binding motifs in consensus sequences of all TE families is shown. **b**, Density of nearly perfect PHE1-  
 231 DNA binding motifs in the consensus sequences of different RC/Helitron families. Nearly perfect motifs  
 232 are those sequences where only one nucleotide substitution is required to generate a perfect PHE1  
 233 DNA-binding motif. As a reference, the density of nearly perfect PHE1 DNA-binding motifs in the  
 234 consensus sequences of all TE families is shown. P-values were determined using  $\chi^2$  tests.

235

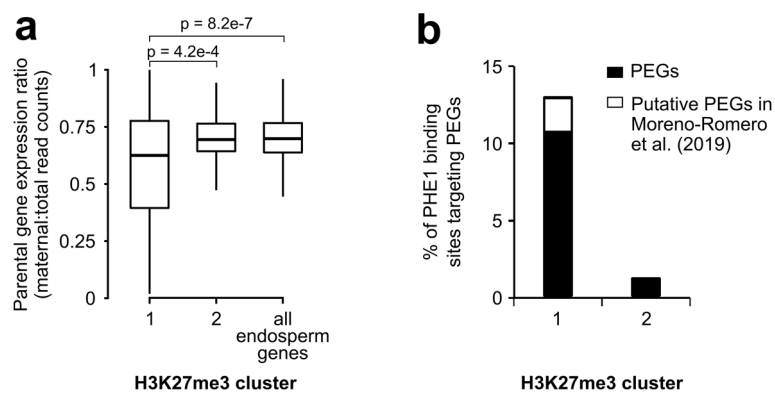

236

237 **Figure 2 – Figure Supplement 1. Characterization of H3K27me3 clusters.**

238 **a**, Parental gene expression ratio of PHE1 targets associated with Cluster 1 and Cluster 2 binding sites,  
239 and all endosperm expressed genes. P-values were determined using two-tailed Mann-Whitney tests.

240 **b**, Fraction of Cluster 1 and Cluster 2 binding sites that target PEGs (**Fig. 1 – source data 1**) and putative  
241 PEGs (Moreno-Romero et al., 2019). (a-b) H3K27me3 clusters are those defined in **Fig. 2b**.

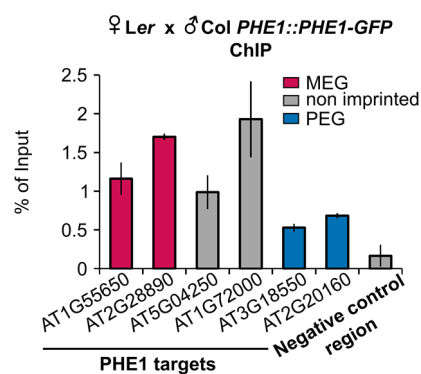

242

243 **Figure 2 – Figure Supplement 2. Parental-specific PHE1 ChIP.**

244 qPCR of purified ChIP-DNA. Enrichment is shown as % of input DNA, in regions associated with MEGs

245 (pink), PEGs (blue), and non-imprinted (grey) PHE1 target genes. Bars represent  $\pm$  sd. Data from one

246 representative biological replicate is shown ( $n = 2$  biological replicates).

247



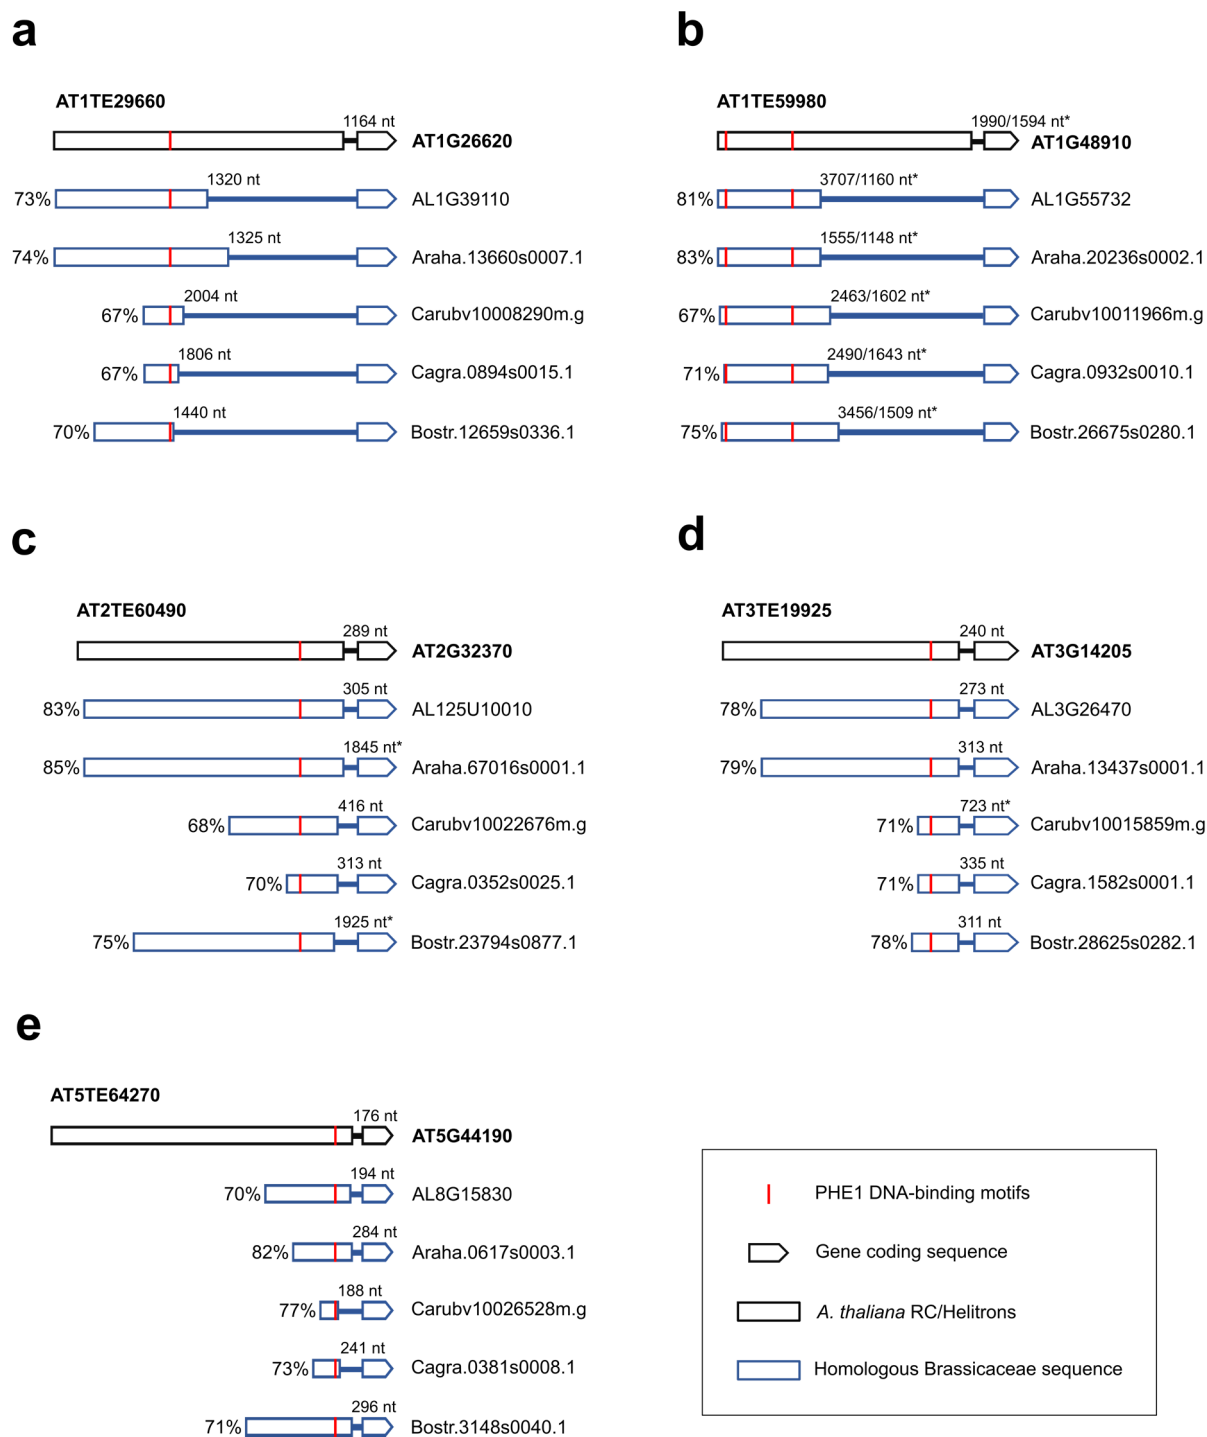

265 **Figure 3 – Figure Supplement 1. Homology analysis of PEGs and upstream RC/Helitron sequences**  
 266 **within Brassicaceae.**

267 Alignments between *Arabidopsis thaliana* RC/Helitrons associated with PEGs (Fig. 3a-e) and  
 268 homologous sequences in other Brassicaceae, where the putative homologous PHE1-DNA binding  
 269 motifs are present across all six species. For each aligned fragment, the percent sequence identity is  
 270 indicated. The distances between the DNA-binding motifs and the TSS of PEGs are labelled. \*



271 corresponds to the distance to the translation start site, in cases where the annotation for the 5'-UTR  
272 of the gene is not available.

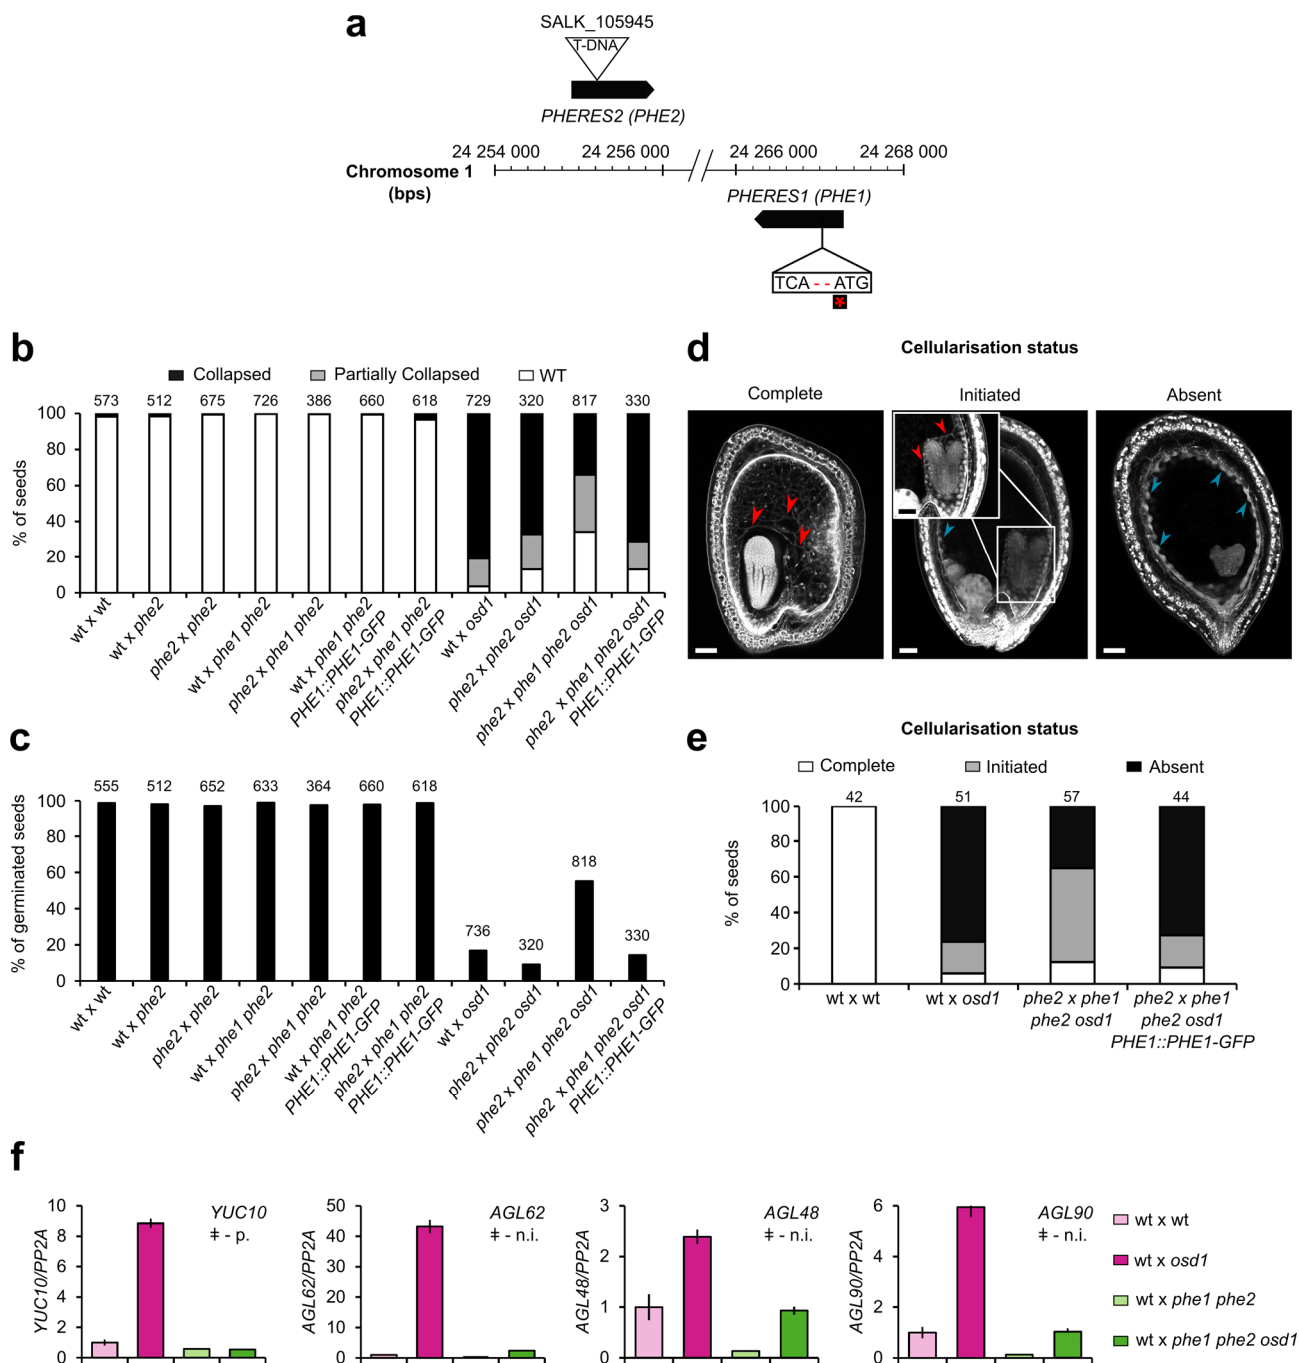

273 **Figure 4 – Figure Supplement 1. Rescue of 3x seed inviability in *phe1 phe2*.**

274 **a**, Schematic representation of the *phe1 phe2* mutant. CRISPR/Cas9 was used to generate a premature  
 275 stop codon in *PHE1*, represented by the red asterisk. *PHE1* mutagenesis was done in the *phe2*  
 276 background, due to the proximity and likely redundancy of both genes (see Methods). **b-c**, Seed  
 277 inviability phenotype (b) of wild-type (wt) and paternal excess crosses, in wt, *phe1 phe2*, and *phe1*  
 278 complementation lines, with respective seed germination rates (c). **d-e**, Status of endosperm  
 279 cellularisation in wt and paternal excess seeds. (b-c,e) *n* = numbers on top of bars (seeds). **f**, Expression

280 of PHE1 target genes in rescued 3x seeds. ‡ - gene neighbours an RC/Helitron containing a PHE1 DNA-  
281 binding motif; p. – PEG; n.i. – non-imprinted gene. Bars represent  $\pm$  sd. Data from one representative  
282 biological replicate is shown ( $n = 2$  biological replicates).

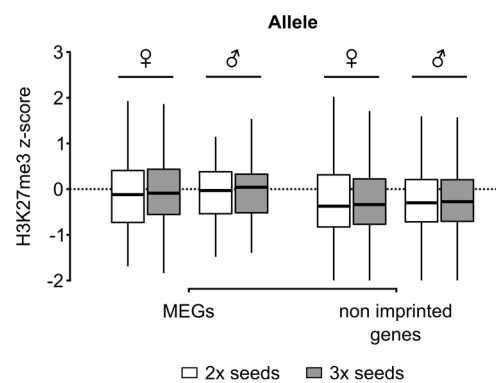

283

284 **Figure 4 – Figure Supplement 2. Distribution of H3K27me3 in 2x and 3x seeds.**

285 Accumulation of H3K27me3 in maternal (♀) and paternal (♂) gene bodies of MEGs and non-imprinted

286 genes in the endosperm of 2x and 3x seeds (white and grey, respectively).

287 **Methods**

288 *Plant material and growth conditions*

289 *Arabidopsis thaliana* seeds were sterilized in a closed vessel containing chlorine gas, for 3 hours.  
290 Chlorine gas was produced by mixing 3 mL HCl 37% and 100 mL of 100% commercial bleach. Sterile  
291 seeds were plated in ½ MS-medium (0.43% MS salts, 0.8% Bacto Agar, 0.19% MES hydrate)  
292 supplemented with 1% Sucrose. When required, appropriate antibiotics were supplemented to the  
293 medium. Seeds were stratified for 48 h, at 4°C, in darkness. Plates containing stratified seeds were  
294 transferred to a long-day growth chamber (16h light / 8h dark; 110 µmol s<sup>-1</sup>m<sup>-2</sup>; 21°C; 70% humidity),  
295 where seedlings grew for 10 days. After this period, the seedlings were transferred to soil and placed  
296 in a long-day growth chamber.

297 Several mutant lines used in this study have been previously described: *osd1-1* (d'Erfurth et al.,  
298 2009), *osd1-3* (Heyman et al., 2011) and *pi-1* (Goto and Meyerowitz, 1994). The *phe2* allele  
299 corresponds to a T-DNA insertion mutant (SALK\_105945). Phenotypical analysis of this mutant  
300 revealed no deviant phenotype relative to Col wt plants (data not shown). Genotyping of *phe2* was  
301 done using the following primers (PHE2 fw 5'-AAATGTCTGGTTTTATGCCCC-3', PHE2 rv 5'-  
302 GTAGCGAGACAATCGATTTTCG-3', T-DNA 5'-ATTTTGCCGATTTTCGGAAC-3').

303

304 *Generation of phe1 phe2*

305 The *phe1 phe2* double mutant was generated using the CRISPR/Cas9 technique. A 20-nt sgRNA  
306 targeting *PHE1* was designed using the CRISPR Design Tool (Ran et al., 2013). A single-stranded DNA  
307 oligonucleotide corresponding to the sequence of the sgRNA, as well as its complementary  
308 oligonucleotide, were synthesized. Bsal restriction sites were added at the 5' and 3' ends, as  
309 represented by the underlined sequences (sgRNA fw 5'- ATTGCTCCTGGATCGAGTTGTAC-3'; sgRNA rv  
310 5'-AAACGTACAACTCGATCCAGGAG-3'). These two oligonucleotides were then annealed to produce a  
311 double stranded DNA molecule.

312 The double-stranded oligonucleotide was ligated into the egg-cell specific pHEE401E CRISPR/Cas9  
313 vector (Z.-P. Wang et al., 2015) through the Bsal restriction sites. This vector was transformed into the  
314 *Agrobacterium tumefaciens* strain GV3101, and *phe2*<sup>-</sup> plants were subsequently transformed using  
315 the floral-dip method (Clough and Bent, 1998).

316 To screen for T1 mutant plants, we performed Sanger sequencing of *PHE1* amplicons derived from  
317 these plants, and obtained with the following primers (fw 5'-AGTGAGGAAAACAACATTCACCA-3'; rv 5'-  
318 GCATCCACAACAGTAGGAGC-3'). The selected mutant contained a homozygous two base pair deletion  
319 that leads to a premature stop codon, and therefore a truncated PHE1<sub>1-50aa</sub> protein. In the T2  
320 generation, the segregation of pHEE401E allowed to select plants that did not contain this vector and  
321 that were double homozygous *phe1 phe2* mutants. Genotyping of the *phe1* allele was done using  
322 primers fw 5'-AAGGAAGAAAGGGATGCTGA-3' and rv 5'-TCTGTTTCTTTGGCGATCCT-3', followed by RsaI  
323 digestion.

324

### 325 *Seed imaging*

326 Analysis of endosperm cellularisation status was done following the Feulgen staining protocol  
327 described previously (Batista et al., 2019). Imaging of Feulgen-stained seeds was done in a Zeiss  
328 LSM780 NLO multiphoton microscope with excitation wavelength of 800 nm, and acquisition between  
329 520 nm – 695 nm.

330

### 331 *RT-qPCR*

332 RNA extraction, cDNA synthesis and qPCR analyses for *AGL* and *PEG* expression were performed as  
333 described previously (Batista et al., 2019). Two biological replicates per cross were used. Primer  
334 sequences for *YUC10*, *AGL62*, and *PP2A* were described previously (Batista et al., 2019). For the  
335 remaining genes, primer sequences were as follows: *AGL48* (fw 5'-TTCGCGATCCACCAGTGTTT-3', rv 5'-  
336 GACCGCCTCTACAAAACCA-3'), *AGL90* (fw 5'-TTGGTGATGAGTCGTTTTCCGA-3', rv 5'-  
337 TCATATTCGCATTGCGTCCG-3').

338

339 *Chromatin immunoprecipitation (ChIP)*

340 To find targets of PHE1, we performed a ChIP experiment using a reporter line containing the PHE1  
341 protein tagged with GFP. This reporter line, which we denote as *PHE1::PHE1-GFP*, contains the *PHE1*  
342 promoter, its coding sequence and its 3' regulatory sequence, and is present in a Col background  
343 (Weinhofer et al., 2010). Given the presence of the 3' regulatory regions (Makarevich et al., 2008), this  
344 reporter behaves as a paternally expressed gene, similarly to the endogenous *PHE1* gene. Crosslinking  
345 of plant material was done by collecting 600 mg of 2 days after pollination (DAP) *PHE1::PHE1-GFP*  
346 siliques, and vacuum infiltrating them with a 1% formaldehyde solution in PBS. The vacuum infiltration  
347 was done for two periods of 15 min, with a vacuum release between each period. The crosslinking was  
348 then stopped by adding 0.125 mM glycine in PBS and performing a vacuum infiltration for a total of 15  
349 min, with a vacuum release each 5 min. The material was then ground in liquid nitrogen, resuspended  
350 in 5mL Honda buffer (Moreno-Romero et al., 2017), and incubated for 15 min with gentle rotation.  
351 This mixture was filtered twice through Miracloth and one time through a CellTrics filter (30  $\mu$ m), after  
352 which a centrifugation for 5 min, at 4°C and 1,500 g was performed. The nuclei pellet was then  
353 resuspended in 100  $\mu$ L of nuclei lysis buffer (Moreno-Romero et al., 2017), and the ChIP protocol was  
354 continued as described before (Moreno-Romero et al., 2017). ChIP DNA was isolated using the Pure  
355 Kit v2 (Diagenode), following the manufacturer's instructions.

356 For the parental-specific PHE1 ChIP the starting material consisted of 600 mg of 2DAP siliques from  
357 crosses between a *pi-1* mother (*Ler* ecotype) and a *PHE1::PHE1-GFP* father (Col ecotype). The male  
358 sterile *pi-1* mutant was used to avoid emasculation of maternal plants. Crosslinking of plant material,  
359 nuclei isolation, ChIP protocol, and ChIP-DNA purification were the same as described before.

360 To assess parental-specific H3K27me3 profiles in 3x seeds, the INTACT system was used to isolate  
361 4DAP endosperm of seeds derived from *Ler pi-1* x Col *INTACT osd1-1* crosses, as described previously  
362 (Jiang et al., 2017; Moreno-Romero et al., 2017). *osd1* mutants were used for their ability to generate  
363 unreduced male gametes, leading to the formation of 3x seeds. ChIPs against H3 and H3K27me3 were



364 then performed on the isolated endosperm nuclei, following the previously described protocol  
365 (Moreno-Romero et al., 2017).

366 The antibodies used for these CHIP experiments were as follows: GFP Tag Antibody (A-11120,  
367 Thermo Fisher Scientific), anti-H3 (Sigma, H9289), and anti-H3K27me3 (Millipore, cat. no. 07-449). All  
368 experiments were performed with two biological replicates.

369

#### 370 *Library preparation and sequencing*

371 *PHE1::PHE1-GFP* CHIP libraries were prepared using the Ovation Ultralow v2 Library System  
372 (NuGEN), with a starting material of 1 ng, following the manufacturer's instructions. These libraries  
373 were sequenced at the SciLife Laboratory (Uppsala, Sweden), on an Illumina HiSeq2500 platform, using  
374 50 bp single-end reads.

375 Library preparation and sequencing of H3K27me3 ChIPs in 3x seeds was done as described  
376 previously (Jiang et al., 2017).

377 Both datasets were deposited at NCBI's Gene Expression Omnibus database  
378 (<https://www.ncbi.nlm.nih.gov/geo/>), under the accession number GSE129744.

379

#### 380 *qPCR and Sanger sequencing of parental-specific PHE1 ChIP*

381 Purified CHIP DNA and its respective input DNA obtained from the parental-specific PHE1 ChIP were  
382 used to perform qPCR. Positive and negative genomic regions for PHE1 binding were amplified using  
383 the following primers: AT1G55650 (fw 5'-CGAAGCGAAAAAGCACTCAC-3'; rv 5'-  
384 CCTTTACATAATCCGCGTTAAA-3'), AT2G28890 (fw 5'-TTTGTGGTTGGAGGTTGTGA-3'; rv 5'-  
385 GTTGTCGTGCCATTTCTT-3'), AT5G04250 (fw 5'-AATTGACAAATGGTGTAAATGGT-3'; rv 5'-  
386 CCAAAGAATTTGTTTTCTATTCC-3'), AT1G72000 (fw 5'-AACAAATATGCACAAGAAGTGC-3'; rv 5'-  
387 ACCTAGCAAGCTGGCAAAC-3'), AT3G18550 (fw 5'-TCCTTTCAAATAAAGGCATAA-3'; rv 5'-  
388 AAATGAAAGAAATAAAGGTAATGAGA-3'), AT2G20160 (fw 5'-TCCTAAATAAGGGAAGAGAAAGCA-3'; rv  
389 5'-TGTTAGGTGAAACTGAATCCAA-3'), negative region (fw 5'-TGTTTTGCTGGTGTATGATG-3', rv 5'-

390 CCATGACACCAGTGTGCCTA-3'). HOT FIREPol EvaGreen qPCR Mix Plus (ROX) (Solis Biodyne) was used  
391 as a master mix for qPCR amplification in a iQ5 qPCR system (Bio-Rad).

392 For Sanger sequencing, positive genomic regions for PHE1 binding containing SNPs that allowed  
393 distinction between parents were amplified by PCR using the Phusion High-Fidelity DNA Polymerase  
394 (Thermo Fisher Scientific), in combination with the primers described above. Amplified DNA was  
395 purified using the GeneJET PCR Purification kit (Thermo Fisher Scientific) and used for Sanger  
396 sequencing. The chromatograms obtained from Sanger sequencing were then analysed for the  
397 presence of SNPs. The maternal:total read ratios were retrieved from the publications where these  
398 genes were identified as imprinted.

399

#### 400 *Bioinformatic analysis of ChIP-seq data*

401 For the *PHE1::PHE1-GFP* ChIP, reads were aligned to the *Arabidopsis* (TAIR10) genome using Bowtie  
402 version 1.2.2 (Langmead, 2010), allowing 2 mismatches (-v 2). Only uniquely mapped reads were kept.  
403 ChIP-seq peaks were called using MACS2 version 2.1.1, with its default settings (--gsize 1.119e8, --bw  
404 250) (Zhang et al., 2008). Input samples served as control for their corresponding GFP ChIP sample.  
405 Each biological replicate was handled individually using the same peak calling settings, and only the  
406 overlapping peak regions between the two replicates were considered for further analysis. These  
407 regions are referred throughout the text as PHE1 binding sites (**Supplementary File 1**). Peak overlap  
408 was determined with BEDtools version 2.26.0 (Quinlan and Hall, 2010). Each PHE1 binding site was  
409 annotated to a genomic feature and matched with a target gene using the peak annotation feature  
410 (annotatePeaks.pl) provided in HOMER version 4.9 (Heinz et al., 2010) (**Supplementary File 1**). Only  
411 binding sites located less than 3 kb away from the nearest transcription start site were considered.

412 PHE1 DNA-binding motifs were identified from *PHE1::PHE1-GFP* ChIP-seq peak regions with  
413 HOMER's findMotifsGenome.pl function, using the default settings. P-values of motif enrichment, as  
414 well as alignments between PHE1 motifs and known motifs were generated by HOMER.

415 Read mapping, coverage analysis, purity calculations, normalisation of data, and determination of  
416 parental origin of reads derived from H3K27me3 ChIPs in 3x seeds was done following previously  
417 published methods (Moreno-Romero et al., 2016) (**Supplementary File 1**).

418

#### 419 *Analysis of PHE1 target genes*

420 Significantly enriched Gene Ontology terms within target genes of PHE1 were identified using  
421 AtCOECIS (Vandepoele et al., 2009), and further summarized using REVIGO (Supek et al., 2011).

422 Enrichment of specific transcription factor families within PHE1 targets was calculated by first  
423 normalizing the number of PHE1-targeted TFs in each family, to the total number of TFs targeted by  
424 PHE1. As a control, the number of TFs belonging to a certain family was normalised to the total number  
425 of TFs in the *Arabidopsis* genome. The Log<sub>2</sub> fold change between these ratios was then calculated for  
426 each family. Significance of the enrichment was assessed using the hypergeometric test. Annotation  
427 of transcription factor families was done following the Plant Transcription Factor Database version 4.0  
428 (Jin et al., 2014). Only TF families containing more than 5 members were considered in this analysis.

429 To determine which imprinted genes are targeted by PHE1, a custom list consisting of the sum of  
430 imprinted genes identified in different studies was used (**Fig. 1 – source data 1**) (Gehring et al., 2011;  
431 Hsieh et al., 2011; Pignatta et al., 2014; Schon and Nodine, 2017; Wolff et al., 2011).

432 To determine the proportion of genes overexpressed in paternal excess crosses that are targeted  
433 by PHE1, a previously published transcriptome dataset of 3x seeds was used (Schatlowski et al., 2014).

434

#### 435 *Spatial overlap of TEs and PHE1 binding sites*

436 Spatial overlap between PHE1 ChIP-seq peak regions (binding sites) and TEs was determined using  
437 the regioneR package version 1.8.1 (Gel et al., 2015), implemented in R version 3.4.1 (Core Team R,  
438 2017). As a control, a mock set of binding sites was created, to which we refer to as random binding  
439 sites. This random binding site set had the same total number of binding sites and the same size  
440 distribution as the PHE1 binding site set. Using regioneR, a Monte Carlo permutation test with 10000

441 iterations was performed. In each iteration the random binding sites were arbitrarily shuffled in the 3  
442 kb promoter region of all *Arabidopsis thaliana* genes. From this shuffling, the average overlap and  
443 standard deviation of the random binding site set was determined, as well as the statistical significance  
444 of the association between PHE1 binding sites and TE superfamilies/families.

445 BedTools version 2.26.0 (Quinlan and Hall, 2010) was used to determine the fraction of PHE1  
446 binding sites targeting MEGs, PEGs, or non-imprinted genes where a spatial overlap between binding  
447 sites, RC/Helitrons and PHE1 DNA-binding motifs is simultaneously observed. The hypergeometric test  
448 was used to assess the significance of the enrichment of PHE1 binding sites where this overlap is  
449 observed, across different target types.

450

#### 451 *Expression analyses of genes flanked by RC/Helitrons*

452 We investigated the expression level of genes containing RC/Helitrons in their promoter regions  
453 (defined as 3kb upstream of the TSS), in embryo, endosperm, and seed coat of pre-globular stage  
454 seeds. Affymetrix GeneChip ATH1 Arabidopsis Genome Array data were extracted from Belmonte et  
455 al., (2013). The expression values in micropylar endosperm, peripheral endosperm, and chalazal  
456 endosperm were averaged to represent the endosperm expression level. The endosperm expression  
457 levels of a given gene were then compared to the expression levels in the embryo and seed coat.

458 RC/Helitron-associated genes were classified into three groups: (i) genes with RC/Helitrons and  
459 PHE1 DNA-binding motifs within the 3kb promoter, thus representing genes with domesticated  
460 RC/Helitrons; (ii) genes having RC/Helitrons and PHE1 DNA-binding motifs within the 3kb promoter,  
461 but not bound by PHE1; and (iii) genes having RC/Helitrons located within the 3kb promoter, and no  
462 PHE1 DNA-binding motifs. A two-tailed Mann-Whitney test with continuity correction was used to  
463 assess statistical significance of differences in expression levels between gene groups.

464

#### 465 *Calculation of PHE1 DNA-binding motif densities*

466 To measure the density of PHE1 DNA-binding motifs within different genomic regions of interest,  
467 the fasta sequences of these regions were first obtained using BEDtools. HOMER's  
468 scanMotifGenomeWide.pl function was then used to screen these sequences for the presence of PHE1  
469 DNA-binding motifs, and to count the number of occurrences of each motif. Motif density was then  
470 calculated as the number of occurrences of each motif, normalized to the size of the genomic region  
471 of interest. Motif densities in RC/Helitron consensus sequences were calculated as above. Perfect PHE1  
472 DNA-binding motif sequences were defined as those represented in **Fig. 1a**. Nearly perfect motif  
473 sequences were defined as sequences where only one nucleotide substitution could give rise to a  
474 perfect PHE1 DNA-binding motif. Consensus sequences were obtained from Repbase (Bao et al., 2015).  
475 Chi-square tests of independence were used to test if there were any associations between specific  
476 genomic regions and PHE1 DNA-binding motifs. This was done by comparing the proportion of DNA  
477 bases corresponding to PHE1 DNA-binding motifs in each genomic region.

478

#### 479 *Identification of homologous PHE1 DNA-binding motifs carried by RC/Helitrons*

480 To assess the homology of PHE1 DNA-binding motifs and associated RC/Helitron sequences,  
481 pairwise comparisons were made among all sequences, using the BLASTN program. The following  
482 parameters were followed: word size = 7, match/mismatch scores = 2/-3, gap penalties, existence = 5,  
483 extension = 2. The RC/Helitron sequences were considered to be homologous if the alignment covered  
484 at least 9 out of the 10 bp PHE1 DNA-binding motif sites, extended longer than 30 bp, and had more  
485 than 70% identity. Because the mean length of intragenomic conserved non-coding sequences is  
486 around 30 bp in *A. thaliana* (Thomas et al., 2007), we considered this as the minimal length of  
487 alignments to define a pair of related motif-carrying TE sequences. The pairwise homologous  
488 sequences were then merged in higher order clusters, based on shared elements in the homologous  
489 pairs.

490

#### 491 *Phylogenetic analyses of PHE1-targeted PEG orthologs in the Brassicaceae*

492 Amino acid sequences and nucleotide sequences of PHE1-targeted PEGs were obtained from  
493 TAIR10. The sequences of homologous genes in the Brassicaceae and several other rosids were  
494 obtained in PLAZA 4.0 (<https://bioinformatics.psb.ugent.be/plaza/>) (Van Bel et al., 2018), BRAD  
495 database (<http://brassicadb.org/brad/>) (X. Wang et al., 2015), and Phytozome v.12  
496 (<https://phytozome.jgi.doe.gov/>) (Goodstein et al., 2012).

497 For each PEG of interest, the amino acid sequences of the gene family were used to generate a  
498 guided codon alignment by MUSCLE with default settings (Edgar, 2004). A maximum likelihood tree  
499 was then generated by IQ-TREE 1.6.7 with codon alignment as the input (Nguyen et al., 2015). The  
500 implemented ModelFinder was executed to determine the best substitution model (Kalyaanamoorthy  
501 et al., 2017), and 1000 replicates of ultrafast bootstrap were applied to evaluate the branch support  
502 (Hoang et al., 2018). The tree topology and branch supports were reciprocally compared with, and  
503 supported by another maximum likelihood tree generated using RAXML v. 8.1.2 (Stamatakis, 2014).

504 We selected PEGs that had well supported gene family phylogeny with no lineage-specific  
505 duplication in the *Arabidopsis* and *Capsella* clades, and where imprinting data were available for all  
506 *Capsella grandiflora* (Cgr), *C. rubella* (Cru), and *Arabidopsis lyrata* (Aly) orthologs of interest (Klosinska  
507 et al., 2016; Lafon-Placette et al., 2018; Pignatta et al., 2014). We then obtained the promoter region,  
508 defined as 3 kb upstream of the TSS, of the orthologs and paralogs in Brassicaceae and rosids species.  
509 These promoter sequences were searched for the presence of homologous RC/Helitron sequences, as  
510 well as for putative PHE1 DNA-binding sites contained in these TEs.

511 Homology between *A. thaliana* RC/Helitron sequences and Brassicaceae sequences was detected  
512 by aligning the *A. thaliana* sequence to the promoter region of the orthologous PEG, using the BLASTN  
513 program, with the following parameters: word size = 11, match/mismatch scores = 2/-3, gap penalties,  
514 existence = 5, extension = 2. Aligned sequences are considered homologous if spanning more than 100  
515 nt of the *Arabidopsis thaliana* RC/Helitron, with over 60% identity.

516

517 *Epigenetic profiling of PHE1 binding sites*

518 Parental-specific H3K27me3 profiles (Moreno-Romero et al., 2016) and DNA methylation profiles  
519 (Schatlowski et al., 2014) generated from endosperm of 2x seeds were used for this analysis. Levels of  
520 H3K27me3 and CG DNA methylation were quantified in each 50 bp bin across the 2 kb region  
521 surrounding PHE1 binding site centres using deepTools version 2.0 (Ramírez et al., 2016). These values  
522 were then used to generate H3K27me3 heatmaps and metagene plots, as well as boxplots of CG  
523 methylation in PHE1 binding sites. Clustering analysis of H3K27me3 distribution in PHE1 binding sites  
524 was done following the k-means algorithm as implemented by deepTools. A two-tailed Mann-Whitney  
525 test with continuity correction was used to assess statistical significance of differences in CG  
526 methylation levels.

527

#### 528 *Parental gene expression ratios in 2x and 3x seeds*

529 To determine parental gene expression ratios in 2x and 3x seeds, we used previously generated  
530 endosperm gene expression data (Martinez et al., 2018). In this dataset, *Ler* plants were used as  
531 maternal plants pollinated with wt Col or *osd1* Col plants, allowing to determine the parental origin of  
532 sequenced reads following the method described before (Moreno-Romero et al., 2019).

533 Parental gene expression ratios were calculated as the number of maternally-derived reads divided  
534 by the sum of maternally- and paternally-derived reads available for any given gene. Ratios were  
535 calculated separately for the two biological replicates of each cross (*Ler* x wt Col and *Ler* x *osd1* Col),  
536 and the average of both replicates was considered for further analysis. The MEG and PEG ratio  
537 thresholds for 2x and 3x seeds indicated in Figure 3d were defined as a four-fold deviation of the  
538 expected read ratios, towards more maternal or paternal read accumulation, respectively. The  
539 expected read ratio for a biallelically expressed gene in 2x seeds is 2 maternal reads : 3 total reads,  
540 while for 3x paternal excess seeds this ratio is 2 maternal reads : 4 total reads. Deviations from these  
541 expected ratios were used to classify the expression of published imprinted genes (**Fig. 1 – source data**  
542 **1**) as maternally or paternally biased in 3x seeds, according to the direction of the deviation. As a  
543 control, the parental bias of these imprinted genes was also assessed in 2x seeds.

544

545 *Parental expression ratios of genes associated with H3K27me3 clusters*

546 Previously published endosperm gene expression data, generated with the INTACT system, was  
547 used for this analysis (Del Toro-De León and Köhler, 2018). Parental gene expression ratios were  
548 determined as the mean between ratios observed in the *Ler* x *Col* cross and its reciprocal cross. As a  
549 reference, the parental gene expression ratio for all endosperm expressed genes was also determined.  
550 A two-tailed Mann-Whitney test with continuity correction was used to assess statistical significance  
551 of differences between parental gene expression ratios.

552

553 *H3K27me3 accumulation in imprinted genes*

554 Parental-specific accumulation of H3K27me3 across imprinted gene bodies in the endosperm of 2x  
555 (Moreno-Romero et al., 2016) and 3x seeds (this study) was estimated by calculating the mean values  
556 of the H3K27me3 z-score across the gene length. Imprinted genes were considered as those genes  
557 previously identified in different studies (Gehring et al., 2011; Hsieh et al., 2011; Pignatta et al., 2014;  
558 Schon and Nodine, 2017; Wolff et al., 2011). A two-tailed Mann-Whitney test with continuity  
559 correction was used to assess statistical significance of differences in H3K27me3 z-score levels.

560

561 *Statistics*

562 Sample size, statistical tests used, and respective p-values are indicated in each figure or figure  
563 legend, and further specified in the corresponding Methods sub-section.

564

565 *Data availability*

566 ChIP-seq data generated in this study is available at NCBI's Gene Expression Omnibus database  
567 (<https://www.ncbi.nlm.nih.gov/geo/>), under the accession number GSE129744. Additional data used  
568 to support the findings of this study are available at NCBI's Gene Expression Omnibus, under the  
569 following accession numbers: H3K27me3 ChIP-seq data from 2x endosperm (Moreno-Romero et al.,



570 2016) - GSE66585; Gene expression data in 2x and 3x endosperm (Martinez et al., 2018) - GSE84122;  
571 Gene expression data in 2x and 3x seeds and parental-specific DNA methylation from 2x endosperm  
572 (Schatlowski et al., 2014) - GSE53642; Parental-specific gene expression data of 2x INTACT-isolated  
573 endosperm nuclei (Del Toro-De León and Köhler, 2018) - GSE119915. Gene expression profile of  
574 different seed compartments (Belmonte et al., 2013) – GSE12404.

#### 575 **Acknowledgments**

576 We thank Qi-Jun Chen for providing the pHEE401E CRISPR/Cas9 vector. We are grateful to Cecilia  
577 Wärdig for technical assistance. Sequencing was performed by the SNP&SEQ Technology Platform,  
578 Science for Life Laboratory at Uppsala University, a national infrastructure supported by the Swedish  
579 Research Council (VRRFI) and the Knut and Alice Wallenberg Foundation. This research was supported  
580 by a grant from the Swedish Research Council (to C.K.), a grant from the Knut and Alice Wallenberg  
581 Foundation (to C.K.), and support from the Göran Gustafsson Foundation for Research in Natural  
582 Sciences and Medicine.

#### 583 **Author contributions**

584 R.A.B., J.M-R., Y.Q, D.D.F and C.K. performed the experimental design. R.A.B., J.M-R., J.V.B. and Y.Q.  
585 performed experiments. R.A.B., J.M-R., Y.Q., J.S-G., and C.K. analysed the data. R.A.B and C.K. wrote  
586 the manuscript. All authors read and commented on the manuscript.

#### 587 **Competing interests**

588 The authors declare no competing interests.

#### 589 **Materials and correspondence**

590 The materials generated in this study are available upon request to C.K. ([claudia.kohler@slu.se](mailto:claudia.kohler@slu.se)).

591 **References**

- 592 Bao, W., Kojima, K.K., Kohany, O., 2015. Repbase Update, a database of repetitive elements in  
593 eukaryotic genomes. *Mobile DNA*. <https://doi.org/10.1186/s13100-015-0041-9>
- 594 Batista, R.A., Figueiredo, D.D., Santos-González, J., Köhler, C., 2019. Auxin regulates endosperm  
595 cellularization in *Arabidopsis*. *Genes & Development*. <https://doi.org/10.1101/gad.316554.118>
- 596 Belmonte, M.F., Kirkbride, R.C., Stone, S.L., Pelletier, J.M., Bui, A.Q., Yeung, E.C., Hashimoto, M., Fei, J.,  
597 Harada, C.M., Munoz, M.D., Le, B.H., Drews, G.N., Brady, S.M., Goldberg, R.B., Harada, J.J., 2013.  
598 Comprehensive developmental profiles of gene activity in regions and subregions of the  
599 *Arabidopsis* seed. *Proceedings of the National Academy of Sciences* 110, E435–E444.  
600 <https://doi.org/10.1073/pnas.1222061110>
- 601 Bemer, M., Heijmans, K., Airoidi, C., Davies, B., Angenent, G.C., 2010. An atlas of type I MADS box gene  
602 expression during female gametophyte and seed development in *Arabidopsis*. *Plant Physiology*  
603 154, 287–300. <https://doi.org/10.1104/pp.110.160770>
- 604 Britten, R.J., Davidson, E.H., 1971. Repetitive and Non-Repetitive DNA Sequences and a Speculation on  
605 the Origins of Evolutionary Novelty. *The Quarterly Review of Biology* 46, 111–138.  
606 <https://doi.org/10.1086/406830>
- 607 Chuong, E.B., Rumi, M.A.K., Soares, M.J., Baker, J.C., 2013. Endogenous retroviruses function as  
608 species-specific enhancer elements in the placenta. *Nature Genetics* 45, 325–329.  
609 <https://doi.org/10.1038/ng.2553>
- 610 Clough, S.J., Bent, A.F., 1998. Floral dip: A simplified method for *Agrobacterium*-mediated  
611 transformation of *Arabidopsis thaliana*. *Plant Journal* 16, 735–743.  
612 <https://doi.org/10.1046/j.1365-313X.1998.00343.x>
- 613 Core Team R, 2017. R: A language and environment for statistical computing., R Foundation for  
614 Statistical Computing. Vienna, Austria. [https://doi.org/ISBN 3-900051-07-0](https://doi.org/ISBN%203-900051-07-0)
- 615 d’Erfurth, I., Jolivet, S., Froger, N., Catrice, O., Novatchkova, M., Mercier, R., 2009. Turning Meiosis into  
616 Mitosis. *PLoS Biology* 7, e1000124. <https://doi.org/10.1371/journal.pbio.1000124>

- 617 Del Toro-De León, G., Köhler, C., 2018. Endosperm-specific transcriptome analysis by applying the  
618 INTACT system. *Plant Reproduction* 32, 55–61. <https://doi.org/10.1007/s00497-018-00356-3>
- 619 Dunn-Fletcher, C.E., Muglia, L.M., Pavlicev, M., Wolf, G., Sun, M.-A., Hu, Y.-C., Huffman, E.,  
620 Tumukuntala, S., Thiele, K., Mukherjee, A., Zoubovsky, S., Zhang, X., Swaggart, K.A., Lamm, K.Y.B.,  
621 Jones, H., Macfarlan, T.S., Muglia, L.J., 2018. Anthropoid primate-specific retroviral element  
622 THE1B controls expression of CRH in placenta and alters gestation length. *PLOS Biology* 16,  
623 e2006337. <https://doi.org/10.1371/journal.pbio.2006337>
- 624 Edgar, R.C., 2004. MUSCLE: multiple sequence alignment with high accuracy and high throughput.  
625 *Nucleic Acids Research* 32, 1792–1797. <https://doi.org/10.1093/nar/gkh340>
- 626 Erilova, A., Brownfield, L., Exner, V., Rosa, M., Twell, D., Scheid, O.M., Hennig, L., Köhler, C., 2009.  
627 Imprinting of the Polycomb group gene MEDEA serves as a ploidy sensor in Arabidopsis. *PLoS*  
628 *Genetics* 5, e1000663. <https://doi.org/10.1371/journal.pgen.1000663>
- 629 Feschotte, C., 2008. Transposable elements and the evolution of regulatory networks. *Nature Reviews*  
630 *Genetics* 9, 397–405. <https://doi.org/10.1038/nrg2337>
- 631 Figueiredo, D.D., Batista, R.A., Roszak, P.J., Hennig, L., Köhler, C., 2016. Auxin production in the  
632 endosperm drives seed coat development in Arabidopsis. *eLife* 5, 1–23.  
633 <https://doi.org/10.7554/eLife.20542>
- 634 Figueiredo, D.D., Batista, R.A., Roszak, P.J., Köhler, C., 2015. Auxin production couples endosperm  
635 development to fertilization. *Nature Plants* 1, 15184. <https://doi.org/10.1038/nplants.2015.184>
- 636 Folter, S. de, Angenent, G.C., 2006. trans meets cis in MADS science. *Trends in Plant Science* 11, 224–  
637 231. <https://doi.org/10.1016/J.TPLANTS.2006.03.008>
- 638 Garcia, D., Saingery, V., Chambrier, P., Mayer, U., Jürgens, G., Berger, F., 2003. Arabidopsis haiku  
639 mutants reveal new controls of seed size by endosperm. *Plant Physiology* 131, 1661–70.  
640 <https://doi.org/10.1104/pp.102.018762>
- 641 Gehring, M., 2013. Genomic Imprinting: Insights From Plants. *Annual Review of Genetics* 47, 187–208.  
642 <https://doi.org/10.1146/annurev-genet-110711-155527>

- 643 Gehring, M., Missirian, V., Henikoff, S., 2011. Genomic analysis of parent-of-origin allelic expression in  
644 *Arabidopsis thaliana* seeds. *PLoS ONE* 6, e23687. <https://doi.org/10.1371/journal.pone.0023687>
- 645 Gel, B., Díez-Villanueva, A., Serra, E., Buschbeck, M., Peinado, M.A., Malinverni, R., 2015. RegioneR: An  
646 R/Bioconductor package for the association analysis of genomic regions based on permutation  
647 tests. *Bioinformatics* 32, 289–291. <https://doi.org/10.1093/bioinformatics/btv562>
- 648 Goodstein, D.M., Shu, S., Howson, R., Neupane, R., Hayes, R.D., Fazo, J., Mitros, T., Dirks, W., Hellsten,  
649 U., Putnam, N., Rokhsar, D.S., 2012. Phytozome: a comparative platform for green plant  
650 genomics. *Nucleic Acids Research* 40, D1178–D1186. <https://doi.org/10.1093/nar/gkr944>
- 651 Goto, K., Meyerowitz, E.M., 1994. Function and regulation of the *Arabidopsis* floral homeotic gene  
652 *PISTILLATA*. *Genes & Development* 8, 1548–1560. <https://doi.org/10.1101/gad.8.13.1548>
- 653 Gramzow, L., Theissen, G., 2010. A hitchhiker’s guide to the MADS world of plants. *Genome Biology*.  
654 <https://doi.org/10.1186/gb-2010-11-6-214>
- 655 Grossniklaus, U., Vielle-Calzada, J.P., Hoepfner, M. a, Gagliano, W.B., 1998. Maternal control of  
656 embryogenesis by *MEDEA*, a polycomb group gene in *Arabidopsis*. *Science* 280, 446–450.  
657 <https://doi.org/10.1126/science.280.5362.446>
- 658 Heinz, S., Benner, C., Spann, N., Bertolino, E., Lin, Y.C., Laslo, P., Cheng, J.X., Murre, C., Singh, H., Glass,  
659 C.K., 2010. Simple Combinations of Lineage-Determining Transcription Factors Prime cis-  
660 Regulatory Elements Required for Macrophage and B Cell Identities. *Molecular Cell* 38, 576–589.  
661 <https://doi.org/10.1016/j.molcel.2010.05.004>
- 662 Hénaff, E., Vives, C., Desvoyes, B., Chaurasia, A., Payet, J., Gutierrez, C., Casacuberta, J.M., 2014.  
663 Extensive amplification of the E2F transcription factor binding sites by transposons during  
664 evolution of Brassica species. *The Plant Journal* 77, 852–862. <https://doi.org/10.1111/tpj.12434>
- 665 Heyman, J., Van den Daele, H., De Wit, K., Boudolf, V., Berckmans, B., Verkest, A., Kamei, C.L.A., De  
666 Jaeger, G., Koncz, C., De Veylder, L., 2011. *Arabidopsis* *ULTRAVIOLET-B-INSENSITIVE4* Maintains  
667 Cell Division Activity by Temporal Inhibition of the Anaphase-Promoting Complex/Cyclosome. *The*  
668 *Plant Cell* 23, 4394–4410. <https://doi.org/10.1105/tpc.111.091793>

- 669 Hirsch, C.D., Springer, N.M., 2017. Transposable element influences on gene expression in plants.  
670 *Biochimica et Biophysica Acta* 1860, 157–165. <https://doi.org/10.1016/j.bbagr.2016.05.010>
- 671 Hoang, D.T., Chernomor, O., von Haeseler, A., Minh, B.Q., Vinh, L.S., 2018. UFBoot2: Improving the  
672 Ultrafast Bootstrap Approximation. *Molecular Biology and Evolution* 35, 518–522.  
673 <https://doi.org/10.1093/molbev/msx281>
- 674 Hsieh, T.F., Shin, J., Uzawa, R., Silva, P., Cohen, S., Bauer, M.J., Hashimoto, M., Kirkbride, R.C., Harada,  
675 J.J., Zilberman, D., Fischer, R.L., 2011. Regulation of imprinted gene expression in Arabidopsis  
676 endosperm. *PNAS* 108, 1755–62. <https://doi.org/10.1073/pnas.1019273108>
- 677 Ishikawa, R., Ohnishi, T., Kinoshita, Y., Eiguchi, M., Kurata, N., Kinoshita, T., 2011. Rice interspecies  
678 hybrids show precocious or delayed developmental transitions in the endosperm without change  
679 to the rate of syncytial nuclear division. *Plant Journal* 65, 798–806.  
680 <https://doi.org/10.1111/j.1365-3113.2010.04466.x>
- 681 Jiang, H., Moreno-Romero, J., Santos-González, J., De Jaeger, G., Gevaert, K., Van De Slijke, E., Köhler,  
682 C., 2017. Ectopic application of the repressive histone modification H3K9me2 establishes post-  
683 zygotic reproductive isolation in Arabidopsis thaliana. *Genes & Development* 31, 1272–1287.  
684 <https://doi.org/10.1101/gad.299347.117>
- 685 Jin, J., Zhang, H., Kong, L., Gao, G., Luo, J., 2014. PlantTFDB 3.0: a portal for the functional and  
686 evolutionary study of plant transcription factors. *Nucleic Acids Research* 42, D1182–D1187.  
687 <https://doi.org/10.1093/nar/gkt1016>
- 688 Jullien, P.E., Berger, F., 2010. Parental genome dosage imbalance deregulates imprinting in  
689 Arabidopsis. *PLoS Genetics* 6, e1000885. <https://doi.org/10.1371/journal.pgen.1000885>
- 690 Kalyaanamoorthy, S., Minh, B.Q., Wong, T.K.F., von Haeseler, A., Jermini, L.S., 2017. ModelFinder: fast  
691 model selection for accurate phylogenetic estimates. *Nature Methods* 14, 587–589.  
692 <https://doi.org/10.1038/nmeth.4285>
- 693 Kang, I.-H., Steffen, J.G., Portereiko, M.F., Lloyd, A., Drews, G.N., 2008. The AGL62 MADS domain  
694 protein regulates cellularization during endosperm development in Arabidopsis. *The Plant Cell*

- 695 20, 635–47. <https://doi.org/10.1105/tpc.107.055137>
- 696 Kiyosue, T., Ohad, N., Yadegari, R., Hannon, M., Dinneny, J., Wells, D., Katz, A., Margossian, L., Harada,  
697 J.J., Goldberg, R.B., Fischer, R.L., 1999. Control of fertilization-independent endosperm  
698 development by the MEDEA polycomb gene in Arabidopsis. PNAS 96, 4186–4191.  
699 <https://doi.org/10.1073/pnas.96.7.4186>
- 700 Klosinska, M., Picard, C.L., Gehring, M., 2016. Conserved imprinting associated with unique epigenetic  
701 signatures in the Arabidopsis genus. Nature Plants 2. <https://doi.org/10.1038/nplants.2016.145>
- 702 Köhler, C., Page, D.R., Gagliardini, V., Grossniklaus, U., 2005. The Arabidopsis thaliana MEDEA  
703 Polycomb group protein controls expression of PHERES1 by parental imprinting. Nature Genetics  
704 37, 28–30. <https://doi.org/10.1038/ng1495>
- 705 Kradolfer, D., Wolff, P., Jiang, H., Siretskiy, A., Köhler, C., 2013. An Imprinted Gene Underlies  
706 Postzygotic Reproductive Isolation in Arabidopsis thaliana. Developmental Cell 26, 525–535.  
707 <https://doi.org/10.1016/J.DEVCEL.2013.08.006>
- 708 Lafon-Placette, C., Hatorangan, M.R., Steige, K.A., Cornille, A., Lascoux, M., Slotte, T., Köhler, C., 2018.  
709 Paternally expressed imprinted genes associate with hybridization barriers in Capsella. Nature  
710 Plants 4, 352–357. <https://doi.org/10.1038/s41477-018-0161-6>
- 711 Langmead, B., 2010. Aligning short sequencing reads with Bowtie. Current Protocols in Bioinformatics  
712 11.7.1-11.7.14. <https://doi.org/10.1002/0471250953.bi1107s32>
- 713 Lu, J., Zhang, C., Baulcombe, D.C., Chen, Z.J., 2012. Maternal siRNAs as regulators of parental genome  
714 imbalance and gene expression in endosperm of Arabidopsis seeds. PNAS 109, 5529–5534.  
715 <https://doi.org/10.1073/pnas.1203094109>
- 716 Luo, M., Dennis, E.S., Chaudhury, A., Peacock, W.J., Berger, F., 2005. MINISEED3 (MINI3), a WRKY family  
717 gene, and HAIKU2 (IKU2), a leucine-rich repeat (LRR) KINASE gene, are regulators of seed size in  
718 Arabidopsis. PNAS 102, 17531–17536. <https://doi.org/10.1073/pnas.0508418102>
- 719 Makarevich, G., Villar, C.B.R., Erilova, A., Köhler, C., 2008. Mechanism of PHERES1 imprinting in  
720 Arabidopsis. Journal of Cell Science 121, 906–912. <https://doi.org/10.1242/jcs.023077>

- 721 Martinez, G., Wolff, P., Wang, Z., Moreno-Romero, J., Santos-González, J., Conze, L.L., DeFraia, C.,  
722 Slotkin, R.K., Köhler, C., 2018. Paternal easiRNAs regulate parental genome dosage in Arabidopsis.  
723 Nature Genetics 50, 193–198. <https://doi.org/10.1038/s41588-017-0033-4>
- 724 Moreno-Romero, J., Del Toro-De León, G., Yadav, V.K., Santos-González, J., Köhler, C., 2019. Epigenetic  
725 signatures associated with imprinted paternally expressed genes in the Arabidopsis endosperm.  
726 Genome Biology 20, 41. <https://doi.org/10.1186/s13059-019-1652-0>
- 727 Moreno-Romero, J., Santos-González, J., Hennig, L., Köhler, C., 2017. Applying the INTACT method to  
728 purify endosperm nuclei and to generate parental-specific epigenome profiles. Nature Protocols  
729 12, 238–254. <https://doi.org/10.1038/nprot.2016.167>
- 730 Moreno-Romero, J., Jiang, H., Santos-González, J., Köhler, C., 2016. Parental epigenetic asymmetry of  
731 PRC2-mediated histone modifications in the Arabidopsis endosperm. The EMBO Journal 35,  
732 1298–1311. <https://doi.org/10.15252/embj.201593534>
- 733 Muiño, J.M., De Bruijn, S., Pajoro, A., Geuten, K., Vingron, M., Angenent, G.C., Kaufmann, K., 2016.  
734 Evolution of DNA-binding sites of a floral master regulatory transcription factor. Molecular  
735 Biology and Evolution 33, 185–200. <https://doi.org/10.1093/molbev/msv210>
- 736 Nguyen, L.-T., Schmidt, H.A., von Haeseler, A., Minh, B.Q., 2015. IQ-TREE: A Fast and Effective  
737 Stochastic Algorithm for Estimating Maximum-Likelihood Phylogenies. Molecular Biology and  
738 Evolution 32, 268–274. <https://doi.org/10.1093/molbev/msu300>
- 739 Pignatta, D., Erdmann, R.M., Scheer, E., Picard, C.L., Bell, G.W., Gehring, M., 2014. Natural epigenetic  
740 polymorphisms lead to intraspecific variation in Arabidopsis gene imprinting. eLife 3.  
741 <https://doi.org/10.7554/eLife.03198>
- 742 Pignatta, D., Novitzky, K., Satyaki, P.R. V., Gehring, M., 2018. A variably imprinted epiallele impacts  
743 seed development. PLOS Genetics 14, e1007469. <https://doi.org/10.1371/journal.pgen.1007469>
- 744 Quinlan, A.R., Hall, I.M., 2010. BEDTools: A flexible suite of utilities for comparing genomic features.  
745 Bioinformatics 26, 841–842. <https://doi.org/10.1093/bioinformatics/btq033>
- 746 Ramírez, F., Ryan, D.P., Grüning, B., Bhardwaj, V., Kilpert, F., Richter, A.S., Heyne, S., Dündar, F., Manke,

- 747 T., 2016. deepTools2: a next generation web server for deep-sequencing data analysis. *Nucleic*  
748 *Acids Research* 44, W160–W165. <https://doi.org/10.1093/nar/gkw257>
- 749 Ran, F.A., Hsu, P.D., Wright, J., Agarwala, V., Scott, D. a, Zhang, F., 2013. Genome engineering using the  
750 CRISPR-Cas9 system. *Nature Protocols* 8, 2281–2308. <https://doi.org/10.1038/nprot.2013.143>
- 751 Rebernic, C.A., Lafon-Placette, C., Hatorangan, M.R., Slotte, T., Köhler, C., 2015. Non-reciprocal  
752 Interspecies Hybridization Barriers in the *Capsella* Genus Are Established in the Endosperm. *PLoS*  
753 *Genetics* 11, e1005295. <https://doi.org/10.1371/journal.pgen.1005295>
- 754 Rodrigues, J.A., Zilberman, D., 2015. Evolution and function of genomic imprinting in plants. *Genes and*  
755 *Development* 29, 2517–2531. <https://doi.org/10.1101/gad.269902.115>
- 756 Roszak, P., Köhler, C., 2011. Polycomb group proteins are required to couple seed coat initiation to  
757 fertilization. *PNAS* 108, 20826–31. <https://doi.org/10.1073/pnas.1117111108>
- 758 Roth, M., Florez-Rueda, A.M., Städler, T., 2019. Differences in Effective Ploidy Drive Genome-Wide  
759 Endosperm Expression Polarization and Seed Failure in Wild Tomato Hybrids. *Genetics*  
760 *genetics.302056.2019*. <https://doi.org/10.1534/genetics.119.302056>
- 761 Satyaki, P.R.V., Gehring, M., 2019. Paternally Acting Canonical RNA-Directed DNA Methylation Pathway  
762 Genes Sensitize Arabidopsis Endosperm to Paternal Genome Dosage. *The Plant Cell* 31, 1563–  
763 1578. <https://doi.org/10.1105/TPC.19.00047>
- 764 Schatlowski, N., Wolff, P., Santos-Gonzalez, J., Schoft, V., Siretskiy, A., Scott, R., Tamaru, H., Kohler, C.,  
765 2014. Hypomethylated Pollen Bypasses the Interploidy Hybridization Barrier in Arabidopsis. *The*  
766 *Plant Cell* 26, 3556–3568. <https://doi.org/10.1105/tpc.114.130120>
- 767 Schon, M.A., Nodine, M.D., 2017. Widespread Contamination of Arabidopsis Embryo and Endosperm  
768 Transcriptome Data Sets. *The Plant Cell* 29, 608–617. <https://doi.org/10.1105/tpc.16.00845>
- 769 Stamatakis, A., 2014. RAxML version 8: a tool for phylogenetic analysis and post-analysis of large  
770 phylogenies. *Bioinformatics* 30, 1312–1313. <https://doi.org/10.1093/bioinformatics/btu033>
- 771 Supek, F., Bošnjak, M., Škunca, N., Šmuc, T., 2011. Revigo summarizes and visualizes long lists of gene  
772 ontology terms. *PLoS ONE* 6, e21800. <https://doi.org/10.1371/journal.pone.0021800>



- 773 Thomas, B.C., Rapaka, L., Lyons, E., Pedersen, B., Freeling, M., 2007. Arabidopsis intragenomic  
774 conserved noncoding sequence. PNAS 104, 3348–53. <https://doi.org/10.1073/pnas.0611574104>
- 775 Tiwari, S., Spielman, M., Schulz, R., Oakey, R.J., Kelsey, G., Salazar, A., Zhang, K., Pennell, R., Scott, R.J.,  
776 2010. Transcriptional profiles underlying parent-of-origin effects in seeds of Arabidopsis thaliana.  
777 BMC Plant Biology 10, 72. <https://doi.org/10.1186/1471-2229-10-72>
- 778 Van Bel, M., Diels, T., Vancaester, E., Kreft, L., Botzki, A., Van de Peer, Y., Coppens, F., Vandepoele, K.,  
779 2018. PLAZA 4.0: an integrative resource for functional, evolutionary and comparative plant  
780 genomics. Nucleic Acids Research 46, D1190–D1196. <https://doi.org/10.1093/nar/gkx1002>
- 781 Vandepoele, K., Quimbaya, M., Casneuf, T., De Veylder, L., Van de Peer, Y., 2009. Unraveling  
782 Transcriptional Control in Arabidopsis Using cis-Regulatory Elements and Coexpression Networks.  
783 Plant Physiology 150, 535–546. <https://doi.org/10.1104/pp.109.136028>
- 784 Villar, C.B.R., Erilova, A., Makarevich, G., Trösch, R., Köhler, C., 2009. Control of PHERES1 Imprinting in  
785 Arabidopsis by Direct Tandem Repeats. Molecular Plant 2, 654–660.  
786 <https://doi.org/10.1093/MP/SSP014>
- 787 Wang, G., Jiang, H., Del Toro de León, G., Martinez, G., Köhler, C., 2018. Sequestration of a Transposon-  
788 Derived siRNA by a Target Mimic Imprinted Gene Induces Postzygotic Reproductive Isolation in  
789 Arabidopsis. Developmental Cell 46, 696-705.e4. <https://doi.org/10.1016/J.DEVCEL.2018.07.014>
- 790 Wang, X., Wu, J., Liang, J., Cheng, F., Wang, Xiaowu, 2015. Brassica database (BRAD) version 2.0:  
791 integrating and mining Brassicaceae species genomic resources. Database 2015, bav093.  
792 <https://doi.org/10.1093/database/bav093>
- 793 Wang, Z.-P., Xing, H.-L., Dong, L., Zhang, H.-Y., Han, C.-Y., Wang, X.-C., Chen, Q.-J., 2015. Egg cell-specific  
794 promoter-controlled CRISPR/Cas9 efficiently generates homozygous mutants for multiple target  
795 genes in Arabidopsis in a single generation. Genome Biology 16, 144.  
796 <https://doi.org/10.1186/s13059-015-0715-0>
- 797 Weinhofer, I., Hehenberger, E., Roszak, P., Hennig, L., Köhler, C., 2010. H3K27me3 profiling of the  
798 endosperm implies exclusion of polycomb group protein targeting by DNA methylation. PLOS

- 799 Genetics 6, 1–14. <https://doi.org/10.1371/journal.pgen.1001152>
- 800 Wolff, P., Jiang, H., Wang, G., Santos-González, J., Köhler, C., 2015. Paternally expressed imprinted  
801 genes establish postzygotic hybridization barriers in *Arabidopsis thaliana*. *eLife* 4.  
802 <https://doi.org/10.7554/eLife.10074>
- 803 Wolff, P., Weinhofer, I., Seguin, J., Roszak, P., Beisel, C., Donoghue, M.T.A., Spillane, C., Nordborg, M.,  
804 Rehmsmeier, M., Köhler, C., 2011. High-Resolution Analysis of Parent-of-Origin Allelic Expression  
805 in the *Arabidopsis* Endosperm. *PLoS Genetics* 7, e1002126.  
806 <https://doi.org/10.1371/journal.pgen.1002126>
- 807 Xing, Q., Creff, A., Waters, A., Tanaka, H., Goodrich, J., Ingram, G.C., Machida, Y., 2013. ZHOUP1 controls  
808 embryonic cuticle formation via a signalling pathway involving the subtilisin protease ABNORMAL  
809 LEAF-SHAPE1 and the receptor kinases GASSHO1 and GASSHO2. *Development* 140, 770–9.  
810 <https://doi.org/10.1242/dev.088898>
- 811 Yang, S., Johnston, N., Talideh, E., Mitchell, S., Jeffree, C., Goodrich, J., Ingram, G., 2008. The  
812 endosperm-specific ZHOUP1 gene of *Arabidopsis thaliana* regulates endosperm breakdown and  
813 embryonic epidermal development. *Development* 135, 3501–9.  
814 <https://doi.org/10.1242/dev.026708>
- 815 Zhang, Y., Liu, T., Meyer, C. a, Eeckhoute, J., Johnson, D.S., Bernstein, B.E., Nussbaum, C., Myers, R.M.,  
816 Brown, M., Li, W., Liu, X.S., 2008. Model-based Analysis of ChIP-Seq (MACS). *Genome Biology* 9,  
817 R137. <https://doi.org/10.1186/gb-2008-9-9-r137>
- 818 Zhao, Y., 2012. Auxin Biosynthesis: A Simple Two-Step Pathway Converts Tryptophan to Indole-3-Acetic  
819 Acid in Plants. *Molecular Plant* 5, 334–338. <https://doi.org/10.1093/MP/SSR104>
- 820
