# Supplementary material for: The MADS-box transcription factor PHERES1 controls imprinting in the endosperm by binding to domesticated transposons
Source: bioRxiv or medRxiv preprint supplement (doi:10.1101/616698), 2019-07-31
Supplement: Supplementary file [file media-1.pdf]

**Supplementary Table 1 | PHE1 ChIP-seq read mapping and peak calling information.** Peak calling was done using the ChIP sample and its respective Input sample as control. The fraction of peaks present in both replicates was determined as the percentage of peaks where spatial overlap between Replicate 1 and Replicate 2 peaks is observed (see Methods).

| Sample                                  | Nr. of sequenced reads | % of mapped reads | Nr. of called ChIP-seq peaks | % of ChIP-seq peaks present in both replicates |
|-----------------------------------------|------------------------|-------------------|------------------------------|------------------------------------------------|
| Replicate 1 <i>PHE1::PHE1-GFP</i> ChIP  | 17 037 975             | 65.3              | 2818                         | 88.5                                           |
| Replicate 1 <i>PHE1::PHE1-GFP</i> Input | 24 276 095             | 71.1              |                              |                                                |
| Replicate 2 <i>PHE1::PHE1-GFP</i> ChIP  | 21 838 147             | 70.5              | 4521                         | 55.2                                           |
| Replicate 2 <i>PHE1::PHE1-GFP</i> Input | 23 372 778             | 70.7              |                              |                                                |

**Supplementary Table 2 | Annotation of PHE1 ChIP-seq peaks within genomic features of interest.**

Annotation for each individual replicate, as well as for common peaks is presented. Common peaks are defined as the overlapping peak regions between Replicate 1 and Replicate 2 (see Methods). Promoter region was considered as the 1000 bp upstream, plus the 100 bp downstream of the transcription start site..

| Sample                               | Total nr. of peaks | Average distance to nearest TSS (bp) | Associated genomic feature (% of peaks) |           |            | Nr.of targeted genes |
|--------------------------------------|--------------------|--------------------------------------|-----------------------------------------|-----------|------------|----------------------|
|                                      |                    |                                      | Promoter                                | Gene body | Intergenic |                      |
| Replicate 1 peaks                    | 2818               | 837                                  | 68.5                                    | 16.1      | 15.3       | 2319                 |
| Replicate 2 peaks                    | 4521               | 792                                  | 68.1                                    | 18.1      | 13.8       | 3430                 |
| Common peaks<br>(PHE1 binding sites) | 2494               | 761                                  | 71.5                                    | 15.3      | 13.3       | 1942                 |

**Supplementary Table 3 | H3K27me3 ChIP-seq read mapping and purity information.**

| <b>Sample</b>                                    | <b>Nr. trimmed reads</b> | <b>% of mapped reads</b> | <b>Nr. of <i>Ler</i> reads</b> | <b>Nr. of Col reads</b> | <b>Purity (%)</b> |
|--------------------------------------------------|--------------------------|--------------------------|--------------------------------|-------------------------|-------------------|
| <i>Ler</i> x Col 4x<br>Replicate 1 Input         | 30 337 933               | 68.3                     | 1 844 412                      | 1 563 394               | 95.7              |
| <i>Ler</i> x Col 4x<br>Replicate 1 H3 ChIP       | 22 644 505               | 73.3                     | 1 439 255                      | 1 211 446               |                   |
| <i>Ler</i> x Col 4x<br>Replicate 1 H3K27me3 ChIP | 27 448 642               | 61.5                     | 1 214 486                      | 681 823                 |                   |
| <i>Ler</i> x Col 4x<br>Replicate 2 Input         | 40 500 367               | 66.4                     | 2 720 117                      | 2 483 912               | 97.7              |
| <i>Ler</i> x Col 4x<br>Replicate 2 H3 ChIP       | 32 322 049               | 71.9                     | 2 304 635                      | 2 068 612               |                   |
| <i>Ler</i> x Col 4x<br>Replicate 2 H3K27me3 ChIP | 34 978 215               | 63.0                     | 2 681 981                      | 1 636 717               |                   |
